# Supplementary material for: Insights into the Serum Metabolic Adaptations in Response to Inspiratory Muscle Training: A Metabolomic Approach Based on 1H NMR and UHPLC-HRMS/MS
Source: MDPI journal article supplement (doi:10.3390/ijms242316764), 2023-11-25
Supplement: s1 [file s1]

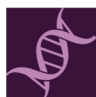

## Insights into the Serum Metabolic Adaptations in Response to Inspiratory muscle training: A Metabolomics Approach Based on $^1\text{H}$ -NMR and UHPLC-HRMS/MS

Alex Castro <sup>1,2,\*</sup>, Aparecida M. Catai <sup>3</sup>, Patrícia Rehder-Santos <sup>3</sup>, Étore F. Signini <sup>3</sup>, Raphael Martins de Abreu <sup>3,†,‡</sup>, Claudio Donisete Da Silva <sup>3</sup>, Carla Cristina Dato <sup>4</sup>, Regina V. Oliveira <sup>1</sup> and Antônio G. Ferreira <sup>1,\*</sup>

<sup>1</sup> Department of Chemistry, Universidade Federal de São Carlos (UFSCar), São Carlos 13565-905, Brazil; oliveirarv@ufscar.br

<sup>2</sup> Biosciences National Laboratory (LNBio), Brazilian Center for Research in Energy and Materials (CNPEM), Campinas 13083-100, Brazil

<sup>3</sup> Department of Physiotherapy, Universidade Federal de São Carlos (UFSCar), São Carlos 13565-905, Brazil; mcatai@ufscar.br (A.M.C.); rehderpaty@hotmail.com (P.R.-S.); efsignini@estudante.ufscar.br (É.F.S.); raphaelmartins.abreu@yahoo.com.br (R.M.d.A.); claudio\_acrobatica@hotmail.com (C.D.D.S.)

<sup>4</sup> Nutrition Course, Central Paulista University Center, São Carlos 13563-470, Brazil; carladatonutricionista@gmail.com

<sup>†</sup> Current affiliation: Department of Physiotherapy, LUNEX University—International University of Health, Exercise and Sports S.A., 4671 Differdange, Luxembourg.

<sup>‡</sup> Current affiliation: LUNEX ASBL Luxembourg Health and Sport Sciences Research Institute, 4671 Differdange, Luxembourg.

\* Correspondence: ax.castro@yahoo.com.br; alex.castro@lnbio.cnpe.br (A.C.); giba@ufscar.br (A.G.F.)

### Supplementary Material

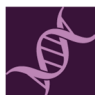

**Table S1** - Serum metabolites annotated by  $^1\text{H}$  NMR spectroscopy and concentration values (mM) for the Sham, MI, and HI groups Pre and Post-inspiratory muscle training. Data are mean  $\pm$  standard deviation.

| Compound               | Sham ( $n = 7$ )  |                   | MI ( $n = 10$ )   |                   | HI ( $n = 10$ )   |                   | p and q-values for LMM effects |       |              |       |        |       |
|------------------------|-------------------|-------------------|-------------------|-------------------|-------------------|-------------------|--------------------------------|-------|--------------|-------|--------|-------|
|                        | Pre               | Post              | Pre               | Post              | Pre               | Post              | G                              |       | T            |       | $G^*T$ |       |
|                        |                   |                   |                   |                   |                   |                   | $p$                            | $q$   | $p$          | $q$   | $p$    | $q$   |
| 2-Hydroxybutyrate      | 0.031 $\pm$ 0.010 | 0.033 $\pm$ 0.014 | 0.043 $\pm$ 0.009 | 0.032 $\pm$ 0.008 | 0.045 $\pm$ 0.024 | 0.040 $\pm$ 0.012 | 0.080                          | 0.013 | <b>0.027</b> | 0.035 | 0.038  | 0.035 |
| 2-Hydroxyisovalerate   | 0.012 $\pm$ 0.007 | 0.010 $\pm$ 0.003 | 0.015 $\pm$ 0.012 | 0.015 $\pm$ 0.016 | 0.011 $\pm$ 0.004 | 0.010 $\pm$ 0.002 | 0.256                          | 0.052 | 0.313        | 0.117 | 0.842  | 0.174 |
| 2-Oxoisocaproate       | 0.007 $\pm$ 0.007 | 0.005 $\pm$ 0.002 | 0.004 $\pm$ 0.002 | 0.005 $\pm$ 0.004 | 0.005 $\pm$ 0.003 | 0.006 $\pm$ 0.002 | 0.248                          | 0.043 | 0.705        | 0.178 | 0.112  | 0.043 |
| 3-Hydroxybutyrate      | 0.062 $\pm$ 0.100 | 0.022 $\pm$ 0.014 | 0.102 $\pm$ 0.125 | 0.025 $\pm$ 0.008 | 0.074 $\pm$ 0.086 | 0.036 $\pm$ 0.037 | 0.496                          | 0.126 | <b>0.001</b> | 0.013 | 0.653  | 0.126 |
| 3-Hydroxyisobutyrate   | 0.017 $\pm$ 0.007 | 0.017 $\pm$ 0.007 | 0.017 $\pm$ 0.004 | 0.016 $\pm$ 0.004 | 0.021 $\pm$ 0.009 | 0.017 $\pm$ 0.006 | 0.853                          | 0.174 | 0.286        | 0.100 | 0.676  | 0.130 |
| 3-Methyl-2-oxovalerate | 0.009 $\pm$ 0.003 | 0.008 $\pm$ 0.002 | 0.008 $\pm$ 0.002 | 0.007 $\pm$ 0.001 | 0.008 $\pm$ 0.002 | 0.007 $\pm$ 0.002 | 0.375                          | 0.100 | 0.043        | 0.039 | 0.861  | 0.187 |
| Acetate                | 0.065 $\pm$ 0.025 | 0.056 $\pm$ 0.021 | 0.057 $\pm$ 0.017 | 0.060 $\pm$ 0.014 | 0.046 $\pm$ 0.015 | 0.046 $\pm$ 0.017 | 0.013                          | 0.004 | 0.681        | 0.174 | 0.245  | 0.083 |
| Acetoacetate           | 0.034 $\pm$ 0.050 | 0.028 $\pm$ 0.029 | 0.053 $\pm$ 0.049 | 0.019 $\pm$ 0.004 | 0.053 $\pm$ 0.047 | 0.031 $\pm$ 0.037 | 0.439                          | 0.113 | <b>0.001</b> | 0.017 | 0.029  | 0.026 |
| Acetone                | 0.184 $\pm$ 0.234 | 0.119 $\pm$ 0.119 | 0.131 $\pm$ 0.119 | 0.169 $\pm$ 0.175 | 0.238 $\pm$ 0.215 | 0.096 $\pm$ 0.113 | 0.883                          | 0.183 | <b>0.020</b> | 0.030 | 0.025  | 0.017 |
| Alanine                | 0.416 $\pm$ 0.123 | 0.367 $\pm$ 0.071 | 0.338 $\pm$ 0.097 | 0.359 $\pm$ 0.094 | 0.408 $\pm$ 0.179 | 0.390 $\pm$ 0.090 | 0.296                          | 0.065 | 0.877        | 0.191 | 0.285  | 0.087 |
| Ascorbate              | 0.042 $\pm$ 0.020 | 0.036 $\pm$ 0.021 | 0.043 $\pm$ 0.011 | 0.037 $\pm$ 0.016 | 0.034 $\pm$ 0.013 | 0.029 $\pm$ 0.009 | 0.311                          | 0.074 | 0.053        | 0.048 | 0.966  | 0.196 |
| Asparagine             | 0.045 $\pm$ 0.019 | 0.039 $\pm$ 0.017 | 0.032 $\pm$ 0.014 | 0.034 $\pm$ 0.018 | 0.034 $\pm$ 0.026 | 0.033 $\pm$ 0.017 | 0.290                          | 0.061 | 0.733        | 0.183 | 0.502  | 0.113 |
| Aspartate              | 0.030 $\pm$ 0.021 | 0.029 $\pm$ 0.015 | 0.023 $\pm$ 0.010 | 0.025 $\pm$ 0.008 | 0.029 $\pm$ 0.012 | 0.033 $\pm$ 0.012 | 0.182                          | 0.026 | 0.226        | 0.087 | 0.698  | 0.152 |
| Betaine                | 0.041 $\pm$ 0.022 | 0.046 $\pm$ 0.030 | 0.046 $\pm$ 0.017 | 0.047 $\pm$ 0.020 | 0.046 $\pm$ 0.017 | 0.046 $\pm$ 0.016 | 0.474                          | 0.122 | 0.629        | 0.161 | 0.994  | 0.200 |
| Choline                | 0.011 $\pm$ 0.006 | 0.012 $\pm$ 0.004 | 0.012 $\pm$ 0.006 | 0.011 $\pm$ 0.004 | 0.011 $\pm$ 0.004 | 0.011 $\pm$ 0.007 | 0.710                          | 0.165 | 0.643        | 0.165 | 0.343  | 0.096 |
| Citrate                | 0.064 $\pm$ 0.018 | 0.053 $\pm$ 0.014 | 0.064 $\pm$ 0.009 | 0.054 $\pm$ 0.009 | 0.066 $\pm$ 0.015 | 0.059 $\pm$ 0.013 | 0.533                          | 0.143 | <b>0.000</b> | 0.009 | 0.555  | 0.117 |
| Creatine               | 0.018 $\pm$ 0.013 | 0.016 $\pm$ 0.009 | 0.016 $\pm$ 0.008 | 0.019 $\pm$ 0.012 | 0.027 $\pm$ 0.023 | 0.025 $\pm$ 0.027 | 0.702                          | 0.161 | 0.913        | 0.196 | 0.945  | 0.191 |
| Creatinine             | 0.102 $\pm$ 0.051 | 0.085 $\pm$ 0.021 | 0.088 $\pm$ 0.010 | 0.085 $\pm$ 0.010 | 0.098 $\pm$ 0.041 | 0.086 $\pm$ 0.013 | 0.944                          | 0.191 | 0.044        | 0.043 | 0.708  | 0.157 |
| Dimethyl sulfone       | 0.006 $\pm$ 0.003 | 0.005 $\pm$ 0.002 | 0.007 $\pm$ 0.003 | 0.008 $\pm$ 0.002 | 0.007 $\pm$ 0.003 | 0.006 $\pm$ 0.003 | 0.170                          | 0.022 | 0.618        | 0.157 | 0.170  | 0.052 |
| Dimethylamine          | 0.004 $\pm$ 0.002 | 0.004 $\pm$ 0.003 | 0.003 $\pm$ 0.000 | 0.002 $\pm$ 0.001 | 0.004 $\pm$ 0.003 | 0.004 $\pm$ 0.003 | 0.407                          | 0.109 | 0.165        | 0.074 | 0.422  | 0.109 |
| Ethanol                | 0.104 $\pm$ 0.049 | 0.108 $\pm$ 0.043 | 0.110 $\pm$ 0.062 | 0.090 $\pm$ 0.020 | 0.149 $\pm$ 0.197 | 0.126 $\pm$ 0.059 | 0.497                          | 0.130 | 0.474        | 0.139 | 0.289  | 0.091 |
| Formate                | 0.027 $\pm$ 0.007 | 0.025 $\pm$ 0.010 | 0.024 $\pm$ 0.004 | 0.025 $\pm$ 0.005 | 0.021 $\pm$ 0.006 | 0.021 $\pm$ 0.005 | 0.037                          | 0.009 | 0.610        | 0.152 | 0.194  | 0.057 |
| Glucose                | 4.449 $\pm$ 1.291 | 3.718 $\pm$ 0.702 | 4.576 $\pm$ 1.420 | 4.073 $\pm$ 0.568 | 5.020 $\pm$ 2.290 | 4.431 $\pm$ 0.924 | 0.231                          | 0.035 | 0.106        | 0.065 | 0.686  | 0.139 |
| Glutamine              | 0.493 $\pm$ 0.169 | 0.475 $\pm$ 0.089 | 0.437 $\pm$ 0.053 | 0.403 $\pm$ 0.128 | 0.495 $\pm$ 0.149 | 0.477 $\pm$ 0.112 | 0.249                          | 0.048 | 0.219        | 0.083 | 0.695  | 0.148 |
| Glycerol               | 3.090 $\pm$ 2.442 | 2.683 $\pm$ 0.523 | 2.764 $\pm$ 0.608 | 2.685 $\pm$ 0.326 | 2.909 $\pm$ 0.960 | 2.949 $\pm$ 0.932 | 0.355                          | 0.091 | 0.127        | 0.070 | 0.198  | 0.061 |



|                   |               |               |               |               |               |               |       |       |              |       |              |       |
|-------------------|---------------|---------------|---------------|---------------|---------------|---------------|-------|-------|--------------|-------|--------------|-------|
| Histidine         | 0.091 ± 0.026 | 0.073 ± 0.012 | 0.081 ± 0.014 | 0.083 ± 0.013 | 0.090 ± 0.032 | 0.083 ± 0.017 | 0.678 | 0.152 | 0.170        | 0.078 | 0.218        | 0.074 |
| Isoleucine        | 0.072 ± 0.027 | 0.062 ± 0.012 | 0.056 ± 0.010 | 0.058 ± 0.008 | 0.062 ± 0.016 | 0.059 ± 0.012 | 0.266 | 0.057 | 0.544        | 0.148 | 0.201        | 0.070 |
| Isopropanol       | 0.009 ± 0.006 | 0.010 ± 0.005 | 0.009 ± 0.006 | 0.009 ± 0.005 | 0.010 ± 0.004 | 0.008 ± 0.003 | 0.986 | 0.200 | 0.384        | 0.126 | 0.345        | 0.100 |
| Lactate           | 2.792 ± 1.316 | 2.477 ± 0.342 | 2.336 ± 0.542 | 2.408 ± 1.018 | 2.422 ± 0.873 | 2.090 ± 0.595 | 0.440 | 0.117 | 0.289        | 0.104 | 0.684        | 0.135 |
| Leucine           | 0.094 ± 0.040 | 0.081 ± 0.011 | 0.084 ± 0.019 | 0.079 ± 0.018 | 0.094 ± 0.029 | 0.094 ± 0.020 | 0.236 | 0.039 | 0.520        | 0.143 | 0.805        | 0.165 |
| Lysine            | 0.149 ± 0.063 | 0.138 ± 0.012 | 0.152 ± 0.023 | 0.158 ± 0.020 | 0.161 ± 0.064 | 0.149 ± 0.029 | 0.311 | 0.078 | 0.976        | 0.200 | 0.583        | 0.122 |
| Methanol          | 0.413 ± 0.238 | 0.394 ± 0.176 | 0.365 ± 0.166 | 0.372 ± 0.161 | 0.516 ± 0.332 | 0.350 ± 0.122 | 0.726 | 0.170 | 0.312        | 0.109 | 0.201        | 0.065 |
| Methionine        | 0.023 ± 0.004 | 0.030 ± 0.002 | 0.026 ± 0.005 | 0.026 ± 0.007 | 0.029 ± 0.007 | 0.028 ± 0.005 | 0.338 | 0.087 | 0.063        | 0.061 | <b>0.007</b> | 0.013 |
| Methylamine       | 0.004 ± 0.004 | 0.002 ± 0.001 | 0.003 ± 0.001 | 0.002 ± 0.002 | 0.004 ± 0.003 | 0.002 ± 0.002 | 0.961 | 0.196 | <b>0.009</b> | 0.022 | 0.808        | 0.170 |
| O-Acetylcarnitine | 0.006 ± 0.007 | 0.008 ± 0.006 | 0.005 ± 0.002 | 0.005 ± 0.004 | 0.006 ± 0.003 | 0.008 ± 0.007 | 0.498 | 0.135 | 0.650        | 0.170 | 0.105        | 0.039 |
| O-Acetylcholine   | 0.008 ± 0.002 | 0.005 ± 0.006 | 0.010 ± 0.004 | 0.004 ± 0.003 | 0.008 ± 0.006 | 0.006 ± 0.003 | 0.866 | 0.178 | <b>0.000</b> | 0.004 | 0.031        | 0.030 |
| Ornithine         | 0.036 ± 0.022 | 0.031 ± 0.029 | 0.030 ± 0.025 | 0.020 ± 0.017 | 0.026 ± 0.015 | 0.025 ± 0.018 | 0.516 | 0.139 | 0.272        | 0.096 | 0.858        | 0.183 |
| Phenylalanine     | 0.069 ± 0.019 | 0.059 ± 0.008 | 0.063 ± 0.009 | 0.061 ± 0.009 | 0.065 ± 0.023 | 0.062 ± 0.010 | 0.931 | 0.187 | 0.062        | 0.057 | 0.237        | 0.078 |
| Proline           | 0.174 ± 0.143 | 0.107 ± 0.050 | 0.100 ± 0.046 | 0.123 ± 0.067 | 0.141 ± 0.052 | 0.176 ± 0.069 | 0.107 | 0.017 | 0.746        | 0.187 | <b>0.006</b> | 0.009 |
| Propylene glycol  | 0.006 ± 0.004 | 0.004 ± 0.002 | 0.004 ± 0.002 | 0.003 ± 0.001 | 0.004 ± 0.002 | 0.003 ± 0.001 | 0.204 | 0.030 | <b>0.013</b> | 0.026 | 0.854        | 0.178 |
| Pyruvate          | 0.034 ± 0.025 | 0.048 ± 0.041 | 0.059 ± 0.025 | 0.041 ± 0.025 | 0.060 ± 0.042 | 0.044 ± 0.015 | 0.338 | 0.083 | 0.229        | 0.091 | 0.025        | 0.022 |
| Succinate         | 0.009 ± 0.004 | 0.005 ± 0.002 | 0.004 ± 0.001 | 0.006 ± 0.005 | 0.005 ± 0.002 | 0.006 ± 0.001 | 0.365 | 0.096 | 0.439        | 0.135 | <b>0.000</b> | 0.004 |
| Threonine         | 0.099 ± 0.039 | 0.101 ± 0.044 | 0.086 ± 0.043 | 0.068 ± 0.049 | 0.101 ± 0.067 | 0.088 ± 0.051 | 0.388 | 0.104 | 0.330        | 0.122 | 0.687        | 0.143 |
| Trimethylamine    | 0.002 ± 0.001 | 0.002 ± 0.001 | 0.002 ± 0.000 | 0.002 ± 0.001 | 0.002 ± 0.002 | 0.002 ± 0.001 | 0.700 | 0.157 | 0.313        | 0.113 | 0.150        | 0.048 |
| Tyrosine          | 0.075 ± 0.029 | 0.065 ± 0.015 | 0.066 ± 0.009 | 0.066 ± 0.009 | 0.076 ± 0.034 | 0.074 ± 0.019 | 0.569 | 0.148 | 0.398        | 0.130 | 0.383        | 0.104 |
| Valine            | 0.278 ± 0.113 | 0.232 ± 0.037 | 0.221 ± 0.028 | 0.216 ± 0.047 | 0.255 ± 0.079 | 0.239 ± 0.052 | 0.302 | 0.070 | 0.057        | 0.052 | 0.759        | 0.161 |

Data are mean ± standard deviation. MI: 60% maximal inspiratory pressure (MIP); HI: ~90% MIP; LMM: Linear Mixed Model; p: P-values for the LMM; q: Adjusted p-values for the false discovery rate (FDR); G: Group main effect; T: Time main effect; *G\*T*: *Group\*Time* interaction. Bold values indicate significant main effects adjusted for the FDR of 0.2 at the significance level of 5%. Data were transformed by Box and Cox procedure before analysis and presented in their original scale. Analyses were conducted in the SPSS software, version 25.0.

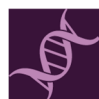

**Table S2** - Serum compounds detected by UHPLC-HRMS/MS in positive ionization mode and peak intensities (u.a.) for the Sham, MI, and HI groups Pre and Post-inspiratory muscle training. Data are mean  $\pm$  standard deviation.

| Compound [retention time<br>(min):mass-to-charge ratio<br>( <i>m/z</i> )] | Sham (n = 7)      |                   | MI (n = 11)       |                   | HI (n = 10)       |                   | p and q-values for LMM effects |          |              |          |              |          |
|---------------------------------------------------------------------------|-------------------|-------------------|-------------------|-------------------|-------------------|-------------------|--------------------------------|----------|--------------|----------|--------------|----------|
|                                                                           |                   |                   |                   |                   |                   |                   | G                              |          | T            |          | G*T          |          |
|                                                                           | Pre               | Post              | Pre               | Post              | Pre               | Post              | <i>p</i>                       | <i>q</i> | <i>p</i>     | <i>q</i> | <i>p</i>     | <i>q</i> |
| 1.69 : 146.030                                                            | 1.098 $\pm$ 0.324 | 1.189 $\pm$ 0.341 | 1.231 $\pm$ 0.524 | 1.317 $\pm$ 0.295 | 1.269 $\pm$ 0.260 | 1.333 $\pm$ 0.330 | 0.303                          | 0.095    | 0.064        | 0.044    | 0.681        | 0.163    |
| 1.90 : 120.066                                                            | 1.053 $\pm$ 0.165 | 0.842 $\pm$ 0.204 | 0.889 $\pm$ 0.140 | 1.029 $\pm$ 0.395 | 0.993 $\pm$ 0.332 | 0.958 $\pm$ 0.250 | 0.965                          | 0.200    | 0.425        | 0.117    | <b>0.007</b> | 0.012    |
| 1.97 : 162.113                                                            | 0.915 $\pm$ 0.139 | 0.773 $\pm$ 0.386 | 0.916 $\pm$ 0.233 | 0.934 $\pm$ 0.198 | 1.069 $\pm$ 0.202 | 1.041 $\pm$ 0.244 | 0.163                          | 0.068    | 0.441        | 0.120    | 0.672        | 0.159    |
| 2.07 : 203.054                                                            | 0.951 $\pm$ 0.156 | 0.839 $\pm$ 0.400 | 0.972 $\pm$ 0.220 | 1.160 $\pm$ 0.188 | 0.985 $\pm$ 0.153 | 1.015 $\pm$ 0.172 | 0.104                          | 0.049    | 0.053        | 0.037    | <b>0.008</b> | 0.015    |
| 2.09 : 104.077                                                            | 0.969 $\pm$ 0.196 | 0.814 $\pm$ 0.426 | 0.871 $\pm$ 0.300 | 1.034 $\pm$ 0.397 | 1.009 $\pm$ 0.300 | 0.796 $\pm$ 0.346 | 0.837                          | 0.185    | 0.461        | 0.129    | 0.166        | 0.088    |
| 2.13 : 116.070                                                            | 0.879 $\pm$ 0.229 | 0.734 $\pm$ 0.322 | 0.741 $\pm$ 0.336 | 0.885 $\pm$ 0.548 | 0.885 $\pm$ 0.268 | 0.947 $\pm$ 0.488 | 0.693                          | 0.163    | 0.851        | 0.178    | 0.284        | 0.102    |
| 2.31 : 169.039                                                            | 1.035 $\pm$ 0.300 | 0.822 $\pm$ 0.387 | 1.084 $\pm$ 0.247 | 1.112 $\pm$ 0.312 | 1.100 $\pm$ 0.232 | 1.108 $\pm$ 0.125 | 0.218                          | 0.080    | 0.177        | 0.071    | 0.066        | 0.056    |
| 3.05 : 182.087                                                            | 0.920 $\pm$ 0.204 | 0.823 $\pm$ 0.418 | 1.007 $\pm$ 0.119 | 1.089 $\pm$ 0.206 | 0.971 $\pm$ 0.144 | 1.104 $\pm$ 0.192 | 0.086                          | 0.041    | 0.090        | 0.056    | 0.064        | 0.054    |
| 3.25 : 136.067                                                            | 0.943 $\pm$ 0.276 | 0.967 $\pm$ 0.335 | 1.097 $\pm$ 0.179 | 1.170 $\pm$ 0.286 | 1.003 $\pm$ 0.139 | 1.138 $\pm$ 0.237 | 0.100                          | 0.044    | 0.082        | 0.054    | 0.502        | 0.146    |
| 3.41 : 86.096                                                             | 1.074 $\pm$ 0.147 | 0.889 $\pm$ 0.409 | 0.975 $\pm$ 0.242 | 1.102 $\pm$ 0.181 | 0.945 $\pm$ 0.207 | 0.978 $\pm$ 0.141 | 0.410                          | 0.112    | 0.804        | 0.173    | <b>0.015</b> | 0.024    |
| 3.42 : 132.096                                                            | 1.061 $\pm$ 0.197 | 0.887 $\pm$ 0.422 | 0.983 $\pm$ 0.154 | 1.117 $\pm$ 0.199 | 0.976 $\pm$ 0.138 | 1.050 $\pm$ 0.190 | 0.775                          | 0.173    | 0.217        | 0.078    | <b>0.009</b> | 0.017    |
| 3.88 : 153.054                                                            | 0.946 $\pm$ 0.428 | 1.191 $\pm$ 0.563 | 0.943 $\pm$ 0.314 | 1.004 $\pm$ 0.390 | 0.982 $\pm$ 0.423 | 1.033 $\pm$ 0.362 | 0.904                          | 0.195    | 0.296        | 0.090    | 0.777        | 0.185    |
| 3.90 : 137.046                                                            | 1.100 $\pm$ 0.746 | 0.824 $\pm$ 0.414 | 0.970 $\pm$ 0.455 | 1.021 $\pm$ 0.326 | 0.995 $\pm$ 0.233 | 0.980 $\pm$ 0.256 | 0.801                          | 0.176    | 0.251        | 0.080    | 0.107        | 0.080    |
| 5.97 : 100.093                                                            | 0.599 $\pm$ 0.714 | 1.188 $\pm$ 1.150 | 0.898 $\pm$ 0.603 | 0.872 $\pm$ 0.584 | 1.509 $\pm$ 1.625 | 1.258 $\pm$ 1.143 | 0.588                          | 0.149    | 0.206        | 0.076    | 0.080        | 0.063    |
| 6.64 : 120.081                                                            | 0.963 $\pm$ 0.100 | 0.842 $\pm$ 0.406 | 0.977 $\pm$ 0.242 | 1.117 $\pm$ 0.258 | 0.937 $\pm$ 0.148 | 0.988 $\pm$ 0.109 | 0.171                          | 0.071    | 0.313        | 0.098    | <b>0.035</b> | 0.037    |
| 6.80 : 166.086                                                            | 0.975 $\pm$ 0.107 | 0.852 $\pm$ 0.396 | 0.982 $\pm$ 0.241 | 1.109 $\pm$ 0.263 | 0.935 $\pm$ 0.156 | 0.981 $\pm$ 0.115 | 0.205                          | 0.076    | 0.419        | 0.115    | 0.047        | 0.044    |
| 7.22 : 209.101                                                            | 0.872 $\pm$ 0.452 | 1.102 $\pm$ 0.426 | 0.852 $\pm$ 0.288 | 1.137 $\pm$ 0.314 | 0.886 $\pm$ 0.234 | 0.899 $\pm$ 0.174 | 0.554                          | 0.144    | <b>0.001</b> | 0.005    | 0.052        | 0.049    |
| 7.47 : 253.126                                                            | 0.984 $\pm$ 0.516 | 1.155 $\pm$ 0.606 | 0.972 $\pm$ 0.369 | 1.278 $\pm$ 0.638 | 0.887 $\pm$ 0.307 | 1.035 $\pm$ 0.559 | 0.590                          | 0.151    | 0.031        | 0.027    | 0.664        | 0.156    |
| 7.71 : 185.128                                                            | 0.926 $\pm$ 0.173 | 0.923 $\pm$ 0.500 | 1.153 $\pm$ 0.468 | 0.982 $\pm$ 0.294 | 0.947 $\pm$ 0.408 | 0.765 $\pm$ 0.256 | 0.210                          | 0.078    | 0.025        | 0.022    | 0.886        | 0.190    |
| 7.75 : 472.683                                                            | 0.956 $\pm$ 0.548 | 0.848 $\pm$ 0.315 | 0.955 $\pm$ 0.503 | 1.029 $\pm$ 0.429 | 0.852 $\pm$ 0.445 | 0.736 $\pm$ 0.192 | 0.432                          | 0.117    | 0.948        | 0.190    | 0.776        | 0.183    |
| 8.09 : 239.148                                                            | 0.980 $\pm$ 0.421 | 1.002 $\pm$ 0.550 | 0.939 $\pm$ 0.244 | 1.088 $\pm$ 0.419 | 0.870 $\pm$ 0.177 | 0.902 $\pm$ 0.367 | 0.534                          | 0.132    | 0.795        | 0.171    | 0.392        | 0.122    |
| 8.14 : 181.072                                                            | 1.091 $\pm$ 0.772 | 1.162 $\pm$ 1.187 | 0.920 $\pm$ 0.527 | 1.188 $\pm$ 0.914 | 0.756 $\pm$ 0.694 | 1.198 $\pm$ 1.147 | 0.837                          | 0.188    | 0.365        | 0.100    | 0.462        | 0.129    |
| 8.14 : 205.097                                                            | 1.074 $\pm$ 0.141 | 0.844 $\pm$ 0.388 | 0.827 $\pm$ 0.166 | 1.173 $\pm$ 0.271 | 0.859 $\pm$ 0.156 | 1.020 $\pm$ 0.289 | 0.685                          | 0.161    | 0.021        | 0.017    | <b>0.000</b> | 0.002    |
| 8.24 : 247.137                                                            | 0.474 $\pm$ 0.385 | 0.555 $\pm$ 0.216 | 1.207 $\pm$ 1.235 | 1.101 $\pm$ 1.234 | 0.886 $\pm$ 0.707 | 0.875 $\pm$ 0.655 | 0.120                          | 0.056    | 0.526        | 0.139    | 0.077        | 0.061    |
| 8.70 : 114.089                                                            | 0.298 $\pm$ 0.323 | 1.694 $\pm$ 3.334 | 0.285 $\pm$ 0.203 | 0.308 $\pm$ 0.262 | 0.468 $\pm$ 0.450 | 0.411 $\pm$ 0.305 | 0.539                          | 0.134    | <b>0.015</b> | 0.015    | <b>0.004</b> | 0.010    |
| 8.82 : 155.152                                                            | 0.867 $\pm$ 0.172 | 1.231 $\pm$ 0.574 | 1.093 $\pm$ 0.262 | 0.992 $\pm$ 0.278 | 0.753 $\pm$ 0.104 | 1.137 $\pm$ 0.350 | 0.450                          | 0.120    | <b>0.005</b> | 0.012    | <b>0.001</b> | 0.005    |
| 9.70 : 113.059                                                            | 0.995 $\pm$ 0.202 | 1.561 $\pm$ 1.576 | 1.004 $\pm$ 0.241 | 1.112 $\pm$ 0.371 | 0.887 $\pm$ 0.129 | 0.949 $\pm$ 0.255 | 0.373                          | 0.105    | 0.311        | 0.095    | 0.979        | 0.200    |
| 10.23 : 134.057                                                           | 0.995 $\pm$ 0.309 | 1.146 $\pm$ 0.366 | 1.141 $\pm$ 0.455 | 1.104 $\pm$ 0.376 | 0.984 $\pm$ 0.647 | 0.966 $\pm$ 0.434 | 0.546                          | 0.139    | 0.486        | 0.137    | 0.708        | 0.168    |

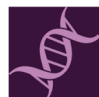

|                  |               |               |               |               |               |               |       |       |              |       |              |       |
|------------------|---------------|---------------|---------------|---------------|---------------|---------------|-------|-------|--------------|-------|--------------|-------|
| 10.44 : 180.067  | 0.683 ± 0.215 | 0.719 ± 0.233 | 1.442 ± 0.823 | 1.261 ± 0.999 | 0.797 ± 0.905 | 0.961 ± 0.822 | 0.133 | 0.061 | 0.564        | 0.144 | 0.295        | 0.107 |
| 10.56 : 603.791  | 0.856 ± 0.550 | 0.643 ± 0.365 | 1.034 ± 0.315 | 0.963 ± 0.522 | 0.987 ± 0.449 | 1.153 ± 0.301 | 0.137 | 0.063 | 0.568        | 0.149 | 0.090        | 0.068 |
| 10.56 : 510.759  | 0.887 ± 0.305 | 0.879 ± 0.428 | 0.934 ± 0.380 | 0.891 ± 0.420 | 0.910 ± 0.335 | 1.192 ± 0.411 | 0.451 | 0.122 | 0.374        | 0.107 | 0.050        | 0.046 |
| 10.87 : 516.300  | 0.932 ± 0.186 | 0.925 ± 0.273 | 0.963 ± 0.222 | 1.068 ± 0.192 | 0.952 ± 0.118 | 0.901 ± 0.207 | 0.340 | 0.102 | 0.862        | 0.180 | 0.380        | 0.120 |
| 10.87 : 733.334  | 0.618 ± 0.407 | 0.698 ± 0.762 | 1.126 ± 0.796 | 1.176 ± 0.909 | 1.019 ± 0.694 | 1.236 ± 0.671 | 0.102 | 0.046 | 0.563        | 0.141 | 0.545        | 0.149 |
| 11.13 : 604.355  | 0.908 ± 0.319 | 1.021 ± 0.166 | 1.020 ± 0.198 | 1.050 ± 0.302 | 1.002 ± 0.185 | 0.908 ± 0.192 | 0.577 | 0.146 | 0.624        | 0.156 | 0.075        | 0.059 |
| 11.36 : 648.378  | 1.043 ± 0.185 | 1.050 ± 0.274 | 0.965 ± 0.295 | 1.093 ± 0.385 | 1.084 ± 0.236 | 0.827 ± 0.139 | 0.519 | 0.129 | 0.156        | 0.068 | <b>0.002</b> | 0.007 |
| 11.36 : 560.323  | 0.940 ± 0.198 | 0.870 ± 0.342 | 0.964 ± 0.200 | 1.140 ± 0.174 | 1.016 ± 0.066 | 1.039 ± 0.153 | 0.131 | 0.059 | 0.037        | 0.029 | <b>0.009</b> | 0.020 |
| 11.62 : 562.340  | 1.002 ± 0.292 | 1.181 ± 0.185 | 0.944 ± 0.135 | 1.021 ± 0.170 | 0.962 ± 0.291 | 0.963 ± 0.197 | 0.244 | 0.088 | <b>0.004</b> | 0.010 | 0.174        | 0.090 |
| 11.76 : 698.786  | 0.830 ± 0.391 | 0.790 ± 0.425 | 1.099 ± 0.436 | 0.899 ± 0.478 | 1.007 ± 0.531 | 1.207 ± 0.463 | 0.205 | 0.073 | 0.667        | 0.168 | <b>0.039</b> | 0.039 |
| 12.21 : 176.072  | 1.023 ± 0.277 | 0.824 ± 0.217 | 0.860 ± 0.398 | 0.875 ± 0.339 | 1.047 ± 0.290 | 1.162 ± 0.588 | 0.236 | 0.085 | 0.567        | 0.146 | 0.311        | 0.112 |
| 13.64 : 585.270  | 1.323 ± 1.041 | 1.045 ± 0.663 | 1.250 ± 0.517 | 1.024 ± 0.423 | 1.107 ± 0.692 | 0.962 ± 0.648 | 0.706 | 0.168 | 0.101        | 0.059 | 0.933        | 0.195 |
| 13.97 : 183.988  | 0.957 ± 0.601 | 1.155 ± 0.599 | 0.880 ± 0.274 | 0.913 ± 0.473 | 0.844 ± 0.289 | 0.892 ± 0.483 | 0.810 | 0.180 | 0.622        | 0.154 | 0.484        | 0.134 |
| 14.97 : 316.247  | 0.802 ± 0.522 | 0.705 ± 0.427 | 1.006 ± 0.517 | 0.773 ± 0.209 | 1.145 ± 1.192 | 1.337 ± 1.587 | 0.652 | 0.156 | 0.887        | 0.188 | 0.288        | 0.105 |
| 15.27 : 290.258  | 0.979 ± 0.212 | 1.330 ± 1.479 | 0.993 ± 0.305 | 1.207 ± 1.249 | 0.943 ± 0.262 | 0.917 ± 0.289 | 0.954 | 0.198 | 0.205        | 0.073 | 0.716        | 0.173 |
| 15.70 : 187.126  | 0.684 ± 0.748 | 0.626 ± 0.570 | 0.974 ± 0.560 | 1.193 ± 0.811 | 0.675 ± 0.456 | 0.888 ± 0.790 | 0.060 | 0.027 | 0.306        | 0.093 | 0.705        | 0.166 |
| 16.22 : 274.274  | 1.165 ± 0.503 | 0.804 ± 0.234 | 0.945 ± 0.310 | 0.836 ± 0.371 | 1.212 ± 0.688 | 0.976 ± 0.317 | 0.493 | 0.124 | <b>0.002</b> | 0.007 | 0.317        | 0.117 |
| 16.82 : 416.309  | 1.429 ± 0.667 | 1.300 ± 1.398 | 1.006 ± 0.625 | 1.635 ± 1.262 | 0.956 ± 0.518 | 0.945 ± 0.727 | 0.554 | 0.141 | 0.958        | 0.195 | 0.148        | 0.085 |
| 18.57 : 330.336  | 1.149 ± 0.593 | 0.938 ± 0.966 | 0.993 ± 0.443 | 0.787 ± 0.881 | 1.003 ± 0.583 | 0.905 ± 0.446 | 0.858 | 0.190 | 0.028        | 0.024 | 0.500        | 0.141 |
| 18.64 : 468.309  | 0.755 ± 0.405 | 0.944 ± 0.558 | 0.912 ± 0.453 | 1.109 ± 0.574 | 0.887 ± 0.386 | 1.182 ± 0.556 | 0.431 | 0.115 | 0.024        | 0.020 | 0.736        | 0.180 |
| 18.80 : 520.340  | 0.873 ± 0.165 | 0.764 ± 0.364 | 0.834 ± 0.139 | 0.889 ± 0.284 | 0.877 ± 0.145 | 0.771 ± 0.226 | 0.809 | 0.178 | 0.148        | 0.066 | 0.092        | 0.076 |
| 18.88 : 1039.673 | 0.865 ± 0.287 | 0.731 ± 0.389 | 0.770 ± 0.162 | 0.903 ± 0.425 | 0.851 ± 0.238 | 0.722 ± 0.302 | 0.865 | 0.193 | 0.382        | 0.110 | <b>0.033</b> | 0.034 |
| 19.26 : 400.353  | 0.784 ± 0.166 | 0.973 ± 0.339 | 1.314 ± 0.413 | 1.316 ± 0.537 | 1.198 ± 0.379 | 1.011 ± 0.461 | 0.025 | 0.010 | 0.986        | 0.198 | 0.083        | 0.066 |
| 19.28 : 494.332  | 0.709 ± 0.223 | 0.612 ± 0.380 | 1.041 ± 0.781 | 0.928 ± 0.385 | 0.941 ± 0.442 | 0.898 ± 0.315 | 0.112 | 0.051 | 0.271        | 0.088 | 0.501        | 0.144 |
| 19.45 : 496.340  | 0.941 ± 0.109 | 0.778 ± 0.345 | 0.974 ± 0.127 | 1.009 ± 0.179 | 0.958 ± 0.090 | 0.889 ± 0.100 | 0.068 | 0.029 | 0.072        | 0.051 | <b>0.020</b> | 0.029 |
| 19.57 : 991.674  | 0.966 ± 0.158 | 0.785 ± 0.354 | 1.020 ± 0.175 | 0.854 ± 0.354 | 1.000 ± 0.131 | 0.939 ± 0.111 | 0.542 | 0.137 | <b>0.000</b> | 0.002 | 0.498        | 0.139 |
| 19.66 : 480.321  | 0.928 ± 0.208 | 0.806 ± 0.372 | 0.989 ± 0.270 | 0.919 ± 0.398 | 0.896 ± 0.262 | 0.813 ± 0.208 | 0.513 | 0.127 | 0.056        | 0.039 | 0.905        | 0.193 |
| 19.69 : 522.356  | 0.906 ± 0.225 | 0.764 ± 0.378 | 0.954 ± 0.209 | 0.934 ± 0.321 | 0.858 ± 0.189 | 0.793 ± 0.195 | 0.266 | 0.093 | 0.067        | 0.049 | 0.493        | 0.137 |
| 19.72 : 428.373  | 0.750 ± 0.197 | 1.099 ± 0.490 | 1.203 ± 0.439 | 1.231 ± 0.490 | 1.071 ± 0.223 | 0.900 ± 0.313 | 0.030 | 0.012 | 0.647        | 0.161 | 0.054        | 0.051 |
| 20.02 : 482.336  | 0.911 ± 0.193 | 0.747 ± 0.338 | 1.097 ± 0.368 | 1.109 ± 0.576 | 0.873 ± 0.264 | 0.764 ± 0.222 | 0.034 | 0.017 | 0.138        | 0.063 | 0.445        | 0.124 |
| 22.11 : 524.371  | 0.905 ± 0.194 | 0.774 ± 0.348 | 1.051 ± 0.269 | 1.098 ± 0.286 | 0.972 ± 0.170 | 0.948 ± 0.308 | 0.048 | 0.022 | 0.400        | 0.112 | 0.255        | 0.098 |
| 22.46 : 870.561  | 0.825 ± 0.420 | 0.623 ± 0.370 | 0.973 ± 0.386 | 1.094 ± 0.616 | 1.095 ± 0.352 | 0.990 ± 0.321 | 0.079 | 0.039 | 0.365        | 0.102 | 0.136        | 0.083 |
| 22.80 : 550.382  | 0.916 ± 0.286 | 1.072 ± 0.716 | 0.949 ± 0.311 | 1.137 ± 0.493 | 0.872 ± 0.223 | 0.726 ± 0.208 | 0.073 | 0.032 | 0.826        | 0.176 | <b>0.011</b> | 0.022 |

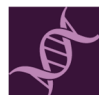

|                  |               |               |               |               |               |               |       |       |       |       |              |       |
|------------------|---------------|---------------|---------------|---------------|---------------|---------------|-------|-------|-------|-------|--------------|-------|
| 23.25 : 760.505  | 0.845 ± 0.313 | 0.868 ± 0.687 | 0.928 ± 0.373 | 1.135 ± 0.943 | 0.979 ± 0.337 | 0.919 ± 0.300 | 0.702 | 0.166 | 0.877 | 0.185 | 0.723        | 0.178 |
| 23.32 : 826.545  | 0.809 ± 0.317 | 0.524 ± 0.347 | 0.898 ± 0.342 | 0.949 ± 0.600 | 0.993 ± 0.337 | 0.845 ± 0.300 | 0.141 | 0.066 | 0.048 | 0.034 | 0.101        | 0.078 |
| 23.32 : 738.492  | 0.821 ± 0.326 | 0.830 ± 0.539 | 0.893 ± 0.340 | 1.022 ± 0.643 | 1.001 ± 0.342 | 0.976 ± 0.336 | 0.672 | 0.159 | 0.661 | 0.166 | 0.709        | 0.171 |
| 23.34 : 694.464  | 0.834 ± 0.237 | 0.950 ± 0.662 | 0.920 ± 0.297 | 0.917 ± 0.514 | 0.970 ± 0.299 | 1.018 ± 0.315 | 0.757 | 0.171 | 0.864 | 0.183 | 0.831        | 0.188 |
| 23.58 : 256.262  | 0.723 ± 0.314 | 0.790 ± 0.409 | 1.004 ± 0.186 | 0.907 ± 0.236 | 0.961 ± 0.209 | 0.934 ± 0.267 | 0.073 | 0.034 | 0.654 | 0.163 | 0.312        | 0.115 |
| 23.75 : 650.441  | 0.773 ± 0.164 | 0.695 ± 0.396 | 0.829 ± 0.260 | 0.796 ± 0.375 | 0.881 ± 0.231 | 0.897 ± 0.221 | 0.319 | 0.100 | 0.486 | 0.134 | 0.719        | 0.176 |
| 23.83 : 737.438  | 0.970 ± 0.074 | 1.476 ± 1.233 | 0.977 ± 0.124 | 1.440 ± 1.644 | 1.035 ± 0.125 | 1.122 ± 0.611 | 0.827 | 0.183 | 0.990 | 0.200 | 0.180        | 0.093 |
| 24.15 : 666.469  | 1.101 ± 0.683 | 1.284 ± 1.111 | 1.128 ± 0.579 | 1.060 ± 0.412 | 1.019 ± 0.276 | 0.848 ± 0.569 | 0.385 | 0.107 | 0.457 | 0.124 | 0.212        | 0.095 |
| 24.23 : 912.627  | 0.825 ± 0.421 | 0.752 ± 0.551 | 0.921 ± 0.434 | 1.112 ± 1.052 | 1.064 ± 0.627 | 1.128 ± 0.664 | 0.392 | 0.110 | 0.602 | 0.151 | 0.584        | 0.151 |
| 24.41 : 597.407  | 0.783 ± 0.576 | 0.459 ± 0.310 | 0.871 ± 0.460 | 1.163 ± 1.082 | 1.066 ± 0.620 | 1.102 ± 0.698 | 0.304 | 0.098 | 0.370 | 0.105 | 0.460        | 0.127 |
| 24.63 : 553.381  | 0.791 ± 0.588 | 0.448 ± 0.365 | 0.931 ± 0.421 | 1.183 ± 1.005 | 1.072 ± 0.661 | 1.121 ± 0.711 | 0.057 | 0.024 | 0.107 | 0.061 | 0.092        | 0.073 |
| 24.66 : 956.641  | 0.742 ± 0.398 | 0.923 ± 1.213 | 0.879 ± 0.392 | 1.100 ± 1.019 | 1.058 ± 0.613 | 1.051 ± 0.634 | 0.625 | 0.154 | 0.955 | 0.193 | 0.954        | 0.198 |
| 24.91 : 531.371  | 0.742 ± 0.580 | 0.494 ± 0.372 | 0.965 ± 0.500 | 1.107 ± 1.004 | 1.050 ± 0.653 | 1.215 ± 0.826 | 0.077 | 0.037 | 0.268 | 0.085 | 0.304        | 0.110 |
| 25.15 : 1000.672 | 0.754 ± 0.470 | 0.423 ± 0.344 | 0.921 ± 0.428 | 1.152 ± 1.063 | 1.044 ± 0.560 | 1.085 ± 0.566 | 0.016 | 0.002 | 0.041 | 0.032 | <b>0.018</b> | 0.027 |
| 25.35 : 916.648  | 0.706 ± 0.425 | 0.427 ± 0.344 | 0.853 ± 0.403 | 1.136 ± 1.137 | 1.036 ± 0.578 | 0.979 ± 0.537 | 0.022 | 0.007 | 0.057 | 0.041 | <b>0.039</b> | 0.041 |
| 25.48 : 740.550  | 0.692 ± 0.217 | 0.732 ± 0.533 | 0.813 ± 0.382 | 1.101 ± 1.082 | 0.973 ± 0.449 | 1.033 ± 0.431 | 0.233 | 0.083 | 0.466 | 0.132 | 0.476        | 0.132 |
| 25.54 : 652.493  | 0.808 ± 0.338 | 0.603 ± 0.375 | 0.958 ± 0.335 | 1.237 ± 1.158 | 0.938 ± 0.376 | 1.104 ± 0.449 | 0.031 | 0.015 | 0.263 | 0.083 | <b>0.022</b> | 0.032 |
| 25.74 : 564.439  | 0.835 ± 0.373 | 0.651 ± 0.451 | 0.973 ± 0.234 | 1.195 ± 0.887 | 0.916 ± 0.325 | 1.024 ± 0.320 | 0.047 | 0.020 | 0.626 | 0.159 | 0.284        | 0.100 |
| 25.99 : 476.394  | 0.806 ± 0.264 | 0.892 ± 0.308 | 0.965 ± 0.204 | 1.151 ± 0.707 | 0.898 ± 0.285 | 1.022 ± 0.273 | 0.259 | 0.090 | 0.065 | 0.046 | 0.652        | 0.154 |
| 26.44 : 284.295  | 0.747 ± 0.299 | 0.724 ± 0.375 | 0.960 ± 0.229 | 1.036 ± 0.327 | 0.979 ± 0.194 | 0.821 ± 0.267 | 0.115 | 0.054 | 0.452 | 0.122 | 0.090        | 0.071 |
| 27.04 : 310.309  | 0.706 ± 0.308 | 0.729 ± 0.391 | 0.975 ± 0.144 | 0.931 ± 0.332 | 0.954 ± 0.220 | 0.868 ± 0.305 | 0.017 | 0.005 | 0.460 | 0.127 | 0.680        | 0.161 |

MI: 60% maximal inspiratory pressure (MIP); HI: ~90% MIP; LMM: Linear Mixed Model; p: p-values for the LMM; q: Adjusted p-values for the false discovery rate (FDR); G: Group main effect; T: Time main effect; *G\*T*: *Group\*Time* interaction. Bold values indicate significant main effects adjusted for the FDR of 0.2 at the significance level of 5%. Data were transformed by Box and Cox procedure before analysis and presented in their original scale. Analyses were conducted in the SPSS software, version 25.0.

**Table S3** - Serum compounds detected by UHPLC-HRMS/MS in negative ionization mode and peak intensities (u.a.) for the Sham, MI, and HI groups Pre and Post-inspiratory muscle training. Data are mean  $\pm$  standard deviation.

| Compound<br>[retention time<br>(min):mass-to-<br>charge ratio ( <i>m/z</i> )] | Sham (n = 7)      |                   | MI (n = 11)       |                   | HI (n = 10)       |                   | p and q-values for LMM effects |          |              |          |              |          |
|-------------------------------------------------------------------------------|-------------------|-------------------|-------------------|-------------------|-------------------|-------------------|--------------------------------|----------|--------------|----------|--------------|----------|
|                                                                               |                   |                   |                   |                   |                   |                   | G                              |          | T            |          | G*T          |          |
|                                                                               | Pre               | Post              | Pre               | Post              | Pre               | Post              | <i>p</i>                       | <i>q</i> | <i>p</i>     | <i>q</i> | <i>p</i>     | <i>q</i> |
| 1.07 : 154.062                                                                | 1.005 $\pm$ 0.267 | 0.984 $\pm$ 0.287 | 1.084 $\pm$ 0.196 | 1.281 $\pm$ 0.305 | 1.267 $\pm$ 0.463 | 0.867 $\pm$ 0.338 | 0.201                          | 0.050    | 0.324        | 0.093    | 0.018        | 0.022    |
| 1.07 : 96.922                                                                 | 0.989 $\pm$ 0.121 | 0.972 $\pm$ 0.095 | 0.996 $\pm$ 0.106 | 1.012 $\pm$ 0.098 | 1.046 $\pm$ 0.110 | 0.990 $\pm$ 0.085 | 0.525                          | 0.123    | 0.381        | 0.110    | 0.172        | 0.078    |
| 1.08 : 94.925                                                                 | 1.002 $\pm$ 0.089 | 0.972 $\pm$ 0.099 | 0.997 $\pm$ 0.119 | 1.028 $\pm$ 0.078 | 1.057 $\pm$ 0.088 | 0.992 $\pm$ 0.125 | 0.339                          | 0.086    | 0.402        | 0.116    | 0.134        | 0.063    |
| 1.09 : 92.928                                                                 | 1.003 $\pm$ 0.088 | 0.984 $\pm$ 0.097 | 1.010 $\pm$ 0.103 | 1.039 $\pm$ 0.087 | 1.076 $\pm$ 0.104 | 1.015 $\pm$ 0.122 | 0.763                          | 0.161    | 0.835        | 0.179    | 0.088        | 0.054    |
| 1.09 : 150.886                                                                | 1.003 $\pm$ 0.101 | 0.941 $\pm$ 0.162 | 0.976 $\pm$ 0.076 | 0.935 $\pm$ 0.073 | 0.932 $\pm$ 0.100 | 1.010 $\pm$ 0.103 | 0.723                          | 0.153    | 0.164        | 0.056    | 0.010        | 0.013    |
| 1.09 : 152.884                                                                | 0.996 $\pm$ 0.135 | 0.973 $\pm$ 0.135 | 0.975 $\pm$ 0.086 | 0.971 $\pm$ 0.109 | 0.950 $\pm$ 0.103 | 1.053 $\pm$ 0.119 | 0.823                          | 0.172    | 0.696        | 0.159    | 0.490        | 0.135    |
| 1.13 : 146.046                                                                | 1.077 $\pm$ 0.837 | 1.112 $\pm$ 0.519 | 0.974 $\pm$ 0.324 | 1.153 $\pm$ 0.720 | 1.048 $\pm$ 0.590 | 0.862 $\pm$ 0.436 | 0.355                          | 0.092    | <b>0.523</b> | 0.133    | 0.773        | 0.174    |
| 1.14 : 145.062                                                                | 1.092 $\pm$ 0.143 | 1.064 $\pm$ 0.629 | 0.886 $\pm$ 0.296 | 0.987 $\pm$ 0.111 | 0.955 $\pm$ 0.094 | 1.021 $\pm$ 0.120 | 0.525                          | 0.125    | 0.678        | 0.155    | 0.017        | 0.020    |
| 1.17 : 112.986                                                                | 0.918 $\pm$ 0.284 | 0.896 $\pm$ 0.291 | 0.926 $\pm$ 0.274 | 0.800 $\pm$ 0.236 | 0.864 $\pm$ 0.314 | 1.085 $\pm$ 0.299 | 0.886                          | 0.189    | 0.009        | 0.026    | 0.023        | 0.024    |
| 1.18 : 195.811                                                                | 1.047 $\pm$ 0.263 | 0.992 $\pm$ 0.334 | 0.983 $\pm$ 0.266 | 0.970 $\pm$ 0.206 | 1.145 $\pm$ 0.263 | 0.874 $\pm$ 0.284 | 0.033                          | 0.013    | 0.501        | 0.129    | 0.000        | 0.002    |
| 1.18 : 154.919                                                                | 0.905 $\pm$ 0.345 | 1.143 $\pm$ 0.243 | 1.017 $\pm$ 0.249 | 0.642 $\pm$ 0.297 | 1.063 $\pm$ 0.258 | 1.077 $\pm$ 0.190 | 0.064                          | 0.024    | 0.662        | 0.148    | 0.151        | 0.072    |
| 1.23 : 217.030                                                                | 0.908 $\pm$ 0.134 | 0.859 $\pm$ 0.263 | 0.978 $\pm$ 0.117 | 1.020 $\pm$ 0.134 | 1.038 $\pm$ 0.127 | 0.988 $\pm$ 0.125 | 0.246                          | 0.061    | 0.303        | 0.090    | 0.814        | 0.178    |
| 1.46 : 119.035                                                                | 0.798 $\pm$ 0.410 | 0.784 $\pm$ 0.405 | 1.214 $\pm$ 0.492 | 1.058 $\pm$ 0.506 | 1.077 $\pm$ 0.483 | 0.972 $\pm$ 0.408 | 0.664                          | 0.146    | 0.380        | 0.108    | 0.000        | 0.004    |
| 1.46 : 116.072                                                                | 0.999 $\pm$ 0.329 | 0.785 $\pm$ 0.383 | 0.842 $\pm$ 0.217 | 1.123 $\pm$ 0.208 | 0.938 $\pm$ 0.358 | 0.995 $\pm$ 0.275 | 0.728                          | 0.157    | 0.517        | 0.131    | 0.540        | 0.137    |
| 1.55 : 135.030                                                                | 0.854 $\pm$ 0.470 | 0.782 $\pm$ 0.602 | 0.852 $\pm$ 0.415 | 0.919 $\pm$ 0.374 | 0.892 $\pm$ 0.348 | 0.681 $\pm$ 0.228 | 0.864                          | 0.181    | 0.005        | 0.017    | 0.184        | 0.080    |
| 1.58 : 96.960                                                                 | 0.890 $\pm$ 0.285 | 1.053 $\pm$ 0.225 | 0.907 $\pm$ 0.211 | 0.956 $\pm$ 0.278 | 0.856 $\pm$ 0.133 | 0.962 $\pm$ 0.279 | 0.426                          | 0.107    | 0.961        | 0.200    | 0.944        | 0.196    |
| 1.60 : 162.839                                                                | 0.967 $\pm$ 0.146 | 0.949 $\pm$ 0.196 | 1.027 $\pm$ 0.150 | 1.031 $\pm$ 0.206 | 0.968 $\pm$ 0.130 | 0.983 $\pm$ 0.128 | 0.416                          | 0.103    | 0.391        | 0.112    | 0.934        | 0.194    |
| 1.60 : 164.836                                                                | 1.003 $\pm$ 0.328 | 0.941 $\pm$ 0.157 | 0.949 $\pm$ 0.161 | 0.922 $\pm$ 0.152 | 1.055 $\pm$ 0.124 | 0.992 $\pm$ 0.270 | 0.399                          | 0.101    | 0.896        | 0.193    | 0.473        | 0.131    |
| 1.61 : 160.842                                                                | 0.925 $\pm$ 0.181 | 0.874 $\pm$ 0.192 | 0.963 $\pm$ 0.166 | 0.975 $\pm$ 0.311 | 0.972 $\pm$ 0.103 | 1.026 $\pm$ 0.190 | 0.110                          | 0.035    | 0.236        | 0.077    | 0.841        | 0.181    |
| 1.71 : 201.038                                                                | 0.981 $\pm$ 0.073 | 1.024 $\pm$ 0.078 | 0.979 $\pm$ 0.132 | 1.007 $\pm$ 0.188 | 0.919 $\pm$ 0.128 | 0.927 $\pm$ 0.098 | 0.209                          | 0.052    | 0.705        | 0.166    | 0.700        | 0.164    |
| 1.71 : 89.024                                                                 | 0.998 $\pm$ 0.213 | 1.009 $\pm$ 0.331 | 0.979 $\pm$ 0.189 | 1.036 $\pm$ 0.329 | 0.888 $\pm$ 0.229 | 0.867 $\pm$ 0.208 | 0.549                          | 0.127    | 0.674        | 0.151    | 0.160        | 0.074    |
| 1.77 : 335.050                                                                | 1.030 $\pm$ 0.205 | 0.873 $\pm$ 0.380 | 1.016 $\pm$ 0.300 | 1.125 $\pm$ 0.357 | 0.992 $\pm$ 0.210 | 0.972 $\pm$ 0.152 | 0.631                          | 0.142    | 0.946        | 0.196    | 0.267        | 0.096    |
| 1.78 : 167.021                                                                | 1.011 $\pm$ 0.116 | 0.924 $\pm$ 0.281 | 1.004 $\pm$ 0.156 | 1.043 $\pm$ 0.236 | 0.994 $\pm$ 0.128 | 1.006 $\pm$ 0.099 | 0.268                          | 0.070    | 0.179        | 0.060    | 0.083        | 0.050    |
| 1.86 : 191.020                                                                | 0.774 $\pm$ 0.180 | 0.880 $\pm$ 0.364 | 1.065 $\pm$ 0.200 | 0.904 $\pm$ 0.286 | 0.958 $\pm$ 0.382 | 0.840 $\pm$ 0.270 | 0.057                          | 0.022    | 0.879        | 0.187    | <b>0.331</b> | 0.109    |
| 1.87 : 128.035                                                                | 0.689 $\pm$ 0.099 | 0.714 $\pm$ 0.211 | 0.729 $\pm$ 0.342 | 0.796 $\pm$ 0.349 | 0.580 $\pm$ 0.114 | 0.556 $\pm$ 0.166 | 0.869                          | 0.185    | <b>0.331</b> | 0.095    | 0.364        | 0.113    |
| 2.26 : 151.026                                                                | 0.827 $\pm$ 0.318 | 1.013 $\pm$ 0.426 | 0.957 $\pm$ 0.239 | 1.000 $\pm$ 0.285 | 1.012 $\pm$ 0.343 | 0.968 $\pm$ 0.346 | 0.869                          | 0.187    | 0.331        | 0.097    | 0.364        | 0.115    |
| 2.49 : 117.019                                                                | 0.821 $\pm$ 0.158 | 0.798 $\pm$ 0.204 | 0.880 $\pm$ 0.226 | 1.073 $\pm$ 0.498 | 0.779 $\pm$ 0.121 | 0.751 $\pm$ 0.084 | 0.075                          | 0.028    | <b>0.996</b> | 0.202    | 0.145        | 0.065    |
| 2.55 : 281.036                                                                | 0.979 $\pm$ 0.133 | 1.019 $\pm$ 0.207 | 1.075 $\pm$ 0.255 | 1.147 $\pm$ 0.281 | 0.952 $\pm$ 0.344 | 0.994 $\pm$ 0.173 | 0.184                          | 0.046    | 0.161        | 0.052    | 0.932        | 0.193    |



|                 |               |               |               |               |               |               |       |       |              |       |       |       |
|-----------------|---------------|---------------|---------------|---------------|---------------|---------------|-------|-------|--------------|-------|-------|-------|
| 2.66 : 180.067  | 0.934 ± 0.228 | 0.869 ± 0.205 | 0.911 ± 0.199 | 1.092 ± 0.246 | 0.925 ± 0.204 | 1.056 ± 0.160 | 0.351 | 0.090 | 0.016        | 0.031 | 0.013 | 0.017 |
| 2.70 : 130.087  | 0.993 ± 0.309 | 0.968 ± 0.294 | 0.936 ± 0.235 | 1.062 ± 0.202 | 0.895 ± 0.244 | 0.926 ± 0.170 | 0.458 | 0.112 | <b>0.252</b> | 0.080 | 0.258 | 0.094 |
| 2.95 : 103.040  | 0.779 ± 0.648 | 0.603 ± 0.318 | 1.391 ± 0.740 | 0.840 ± 0.356 | 0.910 ± 0.337 | 0.711 ± 0.280 | 0.012 | 0.006 | 0.000        | 0.007 | 0.281 | 0.102 |
| 4.28 : 115.040  | 0.899 ± 0.146 | 0.846 ± 0.232 | 1.018 ± 0.326 | 1.070 ± 0.292 | 0.927 ± 0.183 | 0.934 ± 0.183 | 0.210 | 0.054 | 0.960        | 0.198 | 0.570 | 0.146 |
| 5.70 : 147.045  | 0.918 ± 0.214 | 0.887 ± 0.281 | 0.960 ± 0.219 | 1.076 ± 0.218 | 0.908 ± 0.133 | 0.923 ± 0.112 | 0.155 | 0.043 | <b>0.292</b> | 0.088 | 0.147 | 0.070 |
| 5.84 : 164.072  | 0.905 ± 0.147 | 0.822 ± 0.288 | 0.916 ± 0.248 | 1.030 ± 0.237 | 0.897 ± 0.156 | 0.878 ± 0.100 | 0.388 | 0.097 | 0.919        | 0.194 | 0.116 | 0.059 |
| 6.25 : 117.056  | 0.688 ± 0.195 | 0.600 ± 0.291 | 1.219 ± 0.934 | 1.282 ± 1.264 | 0.738 ± 0.273 | 0.742 ± 0.217 | 0.051 | 0.020 | 0.263        | 0.086 | 0.464 | 0.130 |
| 6.34 : 188.986  | 1.383 ± 1.031 | 0.878 ± 0.551 | 0.816 ± 0.485 | 0.947 ± 0.679 | 0.730 ± 0.355 | 0.671 ± 0.339 | 0.441 | 0.110 | 0.253        | 0.082 | 0.211 | 0.083 |
| 7.27 : 172.991  | 0.949 ± 0.991 | 1.091 ± 0.801 | 1.189 ± 1.302 | 0.965 ± 0.680 | 0.844 ± 0.351 | 0.869 ± 0.401 | 0.949 | 0.198 | <b>0.482</b> | 0.125 | 0.622 | 0.156 |
| 7.61 : 203.083  | 1.026 ± 0.209 | 0.887 ± 0.304 | 0.953 ± 0.172 | 1.072 ± 0.222 | 0.965 ± 0.153 | 0.944 ± 0.141 | 0.625 | 0.140 | <b>0.676</b> | 0.153 | 0.007 | 0.009 |
| 8.47 : 291.030  | 1.278 ± 0.137 | 1.049 ± 0.328 | 1.192 ± 0.261 | 1.195 ± 0.308 | 1.265 ± 0.239 | 1.068 ± 0.360 | 0.935 | 0.194 | 0.008        | 0.022 | 0.086 | 0.052 |
| 8.48 : 212.002  | 0.926 ± 0.399 | 0.974 ± 0.539 | 1.173 ± 0.471 | 1.152 ± 0.585 | 0.922 ± 0.700 | 0.835 ± 0.462 | 0.316 | 0.080 | 0.893        | 0.191 | 0.969 | 0.202 |
| 8.50 : 254.928  | 1.077 ± 0.309 | 0.958 ± 0.308 | 1.140 ± 0.321 | 1.078 ± 0.257 | 0.945 ± 0.284 | 1.011 ± 0.212 | 0.272 | 0.072 | 0.218        | 0.073 | 0.233 | 0.089 |
| 8.66 : 129.056  | 0.957 ± 0.139 | 0.838 ± 0.220 | 1.059 ± 0.169 | 1.110 ± 0.417 | 0.878 ± 0.210 | 0.883 ± 0.241 | 0.032 | 0.011 | 0.200        | 0.064 | 0.221 | 0.085 |
| 8.94 : 178.051  | 0.695 ± 0.269 | 0.553 ± 0.328 | 1.133 ± 0.753 | 1.008 ± 0.773 | 0.680 ± 0.619 | 0.742 ± 0.638 | 0.231 | 0.059 | 0.402        | 0.118 | 0.274 | 0.098 |
| 8.98 : 263.103  | 0.747 ± 0.409 | 0.854 ± 0.850 | 1.349 ± 0.675 | 0.950 ± 0.440 | 0.925 ± 1.001 | 0.684 ± 0.329 | 0.074 | 0.026 | 0.225        | 0.075 | 0.403 | 0.120 |
| 9.57 : 187.008  | 1.060 ± 1.086 | 0.901 ± 1.352 | 1.019 ± 0.604 | 0.919 ± 0.562 | 0.797 ± 0.896 | 0.667 ± 0.529 | 0.420 | 0.105 | <b>0.245</b> | 0.079 | 0.606 | 0.154 |
| 11.19 : 171.066 | 1.037 ± 0.416 | 1.010 ± 0.402 | 0.975 ± 0.335 | 1.001 ± 0.232 | 1.086 ± 0.221 | 1.214 ± 0.370 | 0.272 | 0.074 | 0.422        | 0.121 | 0.481 | 0.133 |
| 11.73 : 617.738 | 0.877 ± 0.448 | 0.932 ± 0.359 | 0.980 ± 0.578 | 1.063 ± 0.652 | 0.760 ± 0.245 | 0.909 ± 0.497 | 0.719 | 0.151 | 0.376        | 0.107 | 0.928 | 0.191 |
| 11.97 : 187.097 | 0.863 ± 0.173 | 0.966 ± 0.365 | 0.780 ± 0.192 | 0.964 ± 0.185 | 0.818 ± 0.144 | 0.849 ± 0.241 | 0.675 | 0.150 | 0.009        | 0.024 | 0.116 | 0.061 |
| 12.16 : 383.153 | 1.153 ± 0.700 | 1.248 ± 0.886 | 0.866 ± 0.426 | 0.875 ± 0.354 | 0.848 ± 0.320 | 0.897 ± 0.394 | 0.473 | 0.116 | 0.555        | 0.138 | 0.959 | 0.200 |
| 12.89 : 159.103 | 0.775 ± 0.237 | 0.971 ± 0.263 | 0.884 ± 0.430 | 1.006 ± 0.379 | 0.895 ± 0.278 | 0.805 ± 0.252 | 0.734 | 0.159 | 0.113        | 0.049 | 0.053 | 0.041 |
| 13.08 : 413.200 | 0.905 ± 0.424 | 0.959 ± 0.223 | 1.036 ± 0.337 | 1.104 ± 0.470 | 1.047 ± 0.539 | 0.976 ± 0.441 | 0.794 | 0.170 | 0.578        | 0.142 | 0.562 | 0.144 |
| 14.72 : 369.174 | 0.767 ± 0.665 | 0.776 ± 0.449 | 1.088 ± 0.655 | 1.097 ± 0.748 | 0.823 ± 0.483 | 0.884 ± 0.318 | 0.567 | 0.129 | 0.671        | 0.150 | 0.693 | 0.163 |
| 14.79 : 367.158 | 1.042 ± 0.435 | 1.155 ± 0.488 | 1.055 ± 0.534 | 1.006 ± 0.471 | 0.986 ± 0.421 | 0.982 ± 0.380 | 0.889 | 0.191 | 0.532        | 0.136 | 0.276 | 0.100 |
| 14.82 : 510.253 | 0.972 ± 0.144 | 0.945 ± 0.187 | 0.887 ± 0.279 | 0.927 ± 0.566 | 1.111 ± 0.472 | 1.154 ± 0.601 | 0.217 | 0.056 | 0.869        | 0.185 | 0.914 | 0.189 |
| 14.88 : 397.205 | 0.912 ± 0.308 | 0.894 ± 0.245 | 0.871 ± 0.399 | 0.952 ± 0.303 | 1.068 ± 0.599 | 0.929 ± 0.389 | 0.835 | 0.176 | 0.600        | 0.144 | 0.145 | 0.067 |
| 15.84 : 512.268 | 1.253 ± 0.507 | 0.816 ± 0.751 | 0.874 ± 0.499 | 1.165 ± 0.821 | 0.849 ± 0.464 | 0.726 ± 0.502 | 0.598 | 0.131 | 0.195        | 0.062 | 0.051 | 0.033 |
| 16.39 : 185.118 | 1.039 ± 0.469 | 1.137 ± 0.874 | 0.798 ± 0.473 | 0.919 ± 0.425 | 0.845 ± 0.332 | 0.719 ± 0.209 | 0.295 | 0.079 | 0.791        | 0.170 | 0.226 | 0.087 |
| 16.64 : 221.118 | 0.964 ± 0.045 | 1.002 ± 0.084 | 0.956 ± 0.039 | 0.962 ± 0.110 | 0.990 ± 0.102 | 0.971 ± 0.066 | 0.606 | 0.135 | 0.699        | 0.163 | 0.600 | 0.152 |
| 17.09 : 187.134 | 0.771 ± 0.408 | 0.746 ± 0.230 | 1.162 ± 0.726 | 0.942 ± 0.378 | 0.909 ± 0.411 | 0.732 ± 0.271 | 0.247 | 0.063 | 0.437        | 0.123 | 0.586 | 0.148 |
| 17.16 : 376.225 | 0.871 ± 0.234 | 0.888 ± 0.229 | 1.018 ± 0.218 | 1.081 ± 0.246 | 1.007 ± 0.311 | 0.848 ± 0.163 | 0.075 | 0.031 | 0.563        | 0.140 | 0.052 | 0.037 |
| 18.19 : 512.299 | 0.712 ± 0.324 | 0.896 ± 0.254 | 0.866 ± 0.513 | 1.047 ± 0.545 | 0.771 ± 0.271 | 0.930 ± 0.499 | 0.829 | 0.174 | 0.013        | 0.030 | 0.748 | 0.170 |





|                 |               |               |               |               |               |               |       |       |              |       |              |       |
|-----------------|---------------|---------------|---------------|---------------|---------------|---------------|-------|-------|--------------|-------|--------------|-------|
| 18.28 : 378.241 | 0.825 ± 0.266 | 0.957 ± 0.144 | 1.069 ± 0.220 | 0.969 ± 0.150 | 0.995 ± 0.201 | 0.875 ± 0.145 | 0.118 | 0.039 | 0.524        | 0.135 | <b>0.001</b> | 0.007 |
| 18.37 : 586.315 | 0.433 ± 0.168 | 0.596 ± 0.272 | 0.655 ± 0.270 | 0.826 ± 0.618 | 0.609 ± 0.537 | 0.478 ± 0.260 | 0.193 | 0.048 | <b>0.403</b> | 0.120 | 0.208        | 0.081 |
| 18.63 : 538.315 | 0.682 ± 0.201 | 0.773 ± 0.164 | 1.020 ± 0.697 | 0.909 ± 0.485 | 0.761 ± 0.290 | 0.922 ± 0.293 | 0.476 | 0.118 | 0.079        | 0.044 | 0.060        | 0.044 |
| 18.87 : 194.082 | 0.998 ± 0.114 | 0.906 ± 0.151 | 0.948 ± 0.174 | 0.970 ± 0.155 | 1.051 ± 0.201 | 0.994 ± 0.128 | 0.343 | 0.088 | <b>0.335</b> | 0.099 | 0.545        | 0.139 |
| 18.97 : 500.278 | 1.027 ± 0.280 | 0.936 ± 0.203 | 1.192 ± 0.444 | 1.104 ± 0.387 | 1.315 ± 0.302 | 1.138 ± 0.381 | 0.285 | 0.076 | 0.090        | 0.046 | 0.653        | 0.159 |
| 18.98 : 476.278 | 1.211 ± 0.669 | 1.065 ± 0.334 | 0.997 ± 0.486 | 1.083 ± 0.461 | 1.302 ± 0.475 | 1.199 ± 0.522 | 0.399 | 0.099 | 0.849        | 0.183 | 0.441        | 0.122 |
| 19.00 : 612.331 | 0.508 ± 0.254 | 0.686 ± 0.339 | 0.815 ± 0.480 | 0.736 ± 0.370 | 0.543 ± 0.258 | 0.456 ± 0.173 | 0.075 | 0.030 | <b>0.800</b> | 0.172 | 0.078        | 0.048 |
| 19.06 : 588.331 | 0.649 ± 0.244 | 0.648 ± 0.289 | 0.796 ± 0.198 | 0.760 ± 0.249 | 0.699 ± 0.211 | 0.604 ± 0.187 | 0.134 | 0.041 | <b>0.173</b> | 0.058 | 0.645        | 0.157 |
| 19.17 : 564.331 | 0.802 ± 0.177 | 0.852 ± 0.188 | 0.842 ± 0.187 | 0.869 ± 0.240 | 0.809 ± 0.167 | 0.723 ± 0.170 | 0.440 | 0.108 | 0.815        | 0.176 | 0.331        | 0.107 |
| 19.50 : 452.278 | 0.936 ± 0.173 | 0.980 ± 0.221 | 1.072 ± 0.293 | 1.044 ± 0.348 | 1.039 ± 0.355 | 1.005 ± 0.371 | 0.768 | 0.163 | 0.699        | 0.161 | 0.701        | 0.166 |
| 19.61 : 590.346 | 0.470 ± 0.128 | 0.597 ± 0.279 | 0.750 ± 0.350 | 0.719 ± 0.413 | 0.532 ± 0.141 | 0.509 ± 0.269 | 0.092 | 0.033 | 0.815        | 0.174 | 0.283        | 0.104 |
| 19.71 : 311.222 | 1.008 ± 0.585 | 1.164 ± 0.514 | 1.224 ± 0.605 | 1.154 ± 0.850 | 1.131 ± 0.530 | 1.168 ± 0.616 | 0.965 | 0.202 | 0.783        | 0.168 | 0.552        | 0.141 |
| 19.76 : 540.331 | 0.926 ± 0.108 | 0.932 ± 0.117 | 0.970 ± 0.102 | 0.980 ± 0.151 | 0.963 ± 0.064 | 0.887 ± 0.059 | 0.373 | 0.093 | 0.123        | 0.050 | 0.059        | 0.043 |
| 19.93 : 478.294 | 1.087 ± 0.449 | 1.312 ± 0.487 | 1.037 ± 0.519 | 1.054 ± 0.472 | 1.106 ± 0.417 | 1.168 ± 0.413 | 0.487 | 0.121 | 0.161        | 0.054 | 0.460        | 0.128 |
| 20.04 : 566.347 | 0.756 ± 0.136 | 0.855 ± 0.229 | 0.925 ± 0.192 | 0.897 ± 0.231 | 0.784 ± 0.163 | 0.718 ± 0.194 | 0.043 | 0.017 | <b>0.883</b> | 0.189 | 0.108        | 0.057 |
| 20.10 : 436.283 | 0.701 ± 0.207 | 0.729 ± 0.271 | 0.763 ± 0.262 | 0.775 ± 0.350 | 0.737 ± 0.347 | 0.493 ± 0.203 | 0.117 | 0.037 | 0.049        | 0.041 | 0.015        | 0.019 |
| 20.28 : 524.335 | 0.661 ± 0.122 | 0.708 ± 0.190 | 0.869 ± 0.230 | 0.951 ± 0.553 | 0.634 ± 0.201 | 0.522 ± 0.184 | 0.001 | 0.002 | 0.338        | 0.101 | 0.095        | 0.056 |
| 20.33 : 526.350 | 0.642 ± 0.116 | 0.708 ± 0.209 | 0.803 ± 0.246 | 0.957 ± 0.669 | 0.662 ± 0.131 | 0.581 ± 0.143 | 0.046 | 0.019 | 0.396        | 0.114 | 0.147        | 0.069 |
| 20.37 : 305.187 | 0.996 ± 0.182 | 0.986 ± 0.166 | 0.962 ± 0.211 | 0.917 ± 0.137 | 1.016 ± 0.158 | 0.966 ± 0.163 | 0.672 | 0.148 | 0.206        | 0.067 | 0.840        | 0.179 |
| 20.43 : 233.154 | 0.899 ± 0.120 | 0.957 ± 0.169 | 0.950 ± 0.180 | 0.930 ± 0.189 | 0.803 ± 0.169 | 0.975 ± 0.115 | 0.646 | 0.144 | 0.010        | 0.028 | 0.008        | 0.011 |
| 20.60 : 554.346 | 0.771 ± 0.309 | 0.751 ± 0.244 | 1.141 ± 0.377 | 1.028 ± 0.359 | 0.910 ± 0.147 | 0.874 ± 0.315 | 0.009 | 0.004 | 0.202        | 0.065 | 0.795        | 0.176 |
| 20.61 : 592.361 | 0.595 ± 0.122 | 0.762 ± 0.331 | 0.770 ± 0.308 | 0.808 ± 0.389 | 0.641 ± 0.192 | 0.558 ± 0.217 | 0.173 | 0.044 | 0.817        | 0.178 | 0.078        | 0.046 |
| 20.80 : 552.366 | 0.626 ± 0.162 | 0.727 ± 0.272 | 0.754 ± 0.214 | 0.838 ± 0.464 | 0.577 ± 0.164 | 0.533 ± 0.170 | 0.019 | 0.007 | 0.687        | 0.157 | 0.333        | 0.111 |
| 20.94 : 235.170 | 1.008 ± 0.171 | 1.089 ± 0.170 | 1.023 ± 0.186 | 1.031 ± 0.169 | 1.028 ± 0.159 | 1.041 ± 0.149 | 0.930 | 0.193 | 0.210        | 0.071 | 0.455        | 0.126 |
| 21.15 : 480.309 | 1.303 ± 0.409 | 0.853 ± 0.429 | 1.267 ± 0.506 | 1.141 ± 0.222 | 1.343 ± 0.399 | 1.135 ± 0.382 | 0.328 | 0.084 | 0.000        | 0.004 | 0.033        | 0.026 |
| 21.83 : 483.368 | 1.309 ± 0.385 | 1.211 ± 0.436 | 1.181 ± 0.532 | 1.117 ± 0.482 | 1.261 ± 0.448 | 1.184 ± 0.438 | 0.610 | 0.136 | 0.258        | 0.084 | 0.950        | 0.198 |
| 21.85 : 568.362 | 0.883 ± 0.169 | 0.904 ± 0.121 | 1.001 ± 0.208 | 1.026 ± 0.256 | 0.987 ± 0.163 | 0.867 ± 0.188 | 0.228 | 0.057 | 0.309        | 0.092 | 0.040        | 0.031 |
| 21.98 : 612.387 | 1.232 ± 0.607 | 1.017 ± 0.137 | 1.041 ± 0.159 | 1.050 ± 0.146 | 1.244 ± 0.504 | 0.941 ± 0.118 | 0.961 | 0.200 | 0.021        | 0.033 | 0.012        | 0.015 |
| 21.99 : 585.352 | 1.270 ± 0.404 | 1.018 ± 0.174 | 1.034 ± 0.219 | 1.024 ± 0.123 | 1.233 ± 0.356 | 0.947 ± 0.107 | 0.791 | 0.168 | 0.032        | 0.037 | 0.169        | 0.076 |
| 22.00 : 652.323 | 1.073 ± 0.269 | 0.941 ± 0.401 | 1.070 ± 0.084 | 1.009 ± 0.155 | 1.312 ± 0.358 | 0.900 ± 0.116 | 0.465 | 0.114 | 0.000        | 0.002 | 0.001        | 0.006 |
| 22.01 : 560.331 | 1.216 ± 0.375 | 0.997 ± 0.239 | 1.080 ± 0.214 | 1.040 ± 0.137 | 1.164 ± 0.212 | 0.944 ± 0.185 | 0.938 | 0.196 | 0.000        | 0.006 | 0.034        | 0.028 |
| 22.18 : 464.314 | 0.709 ± 0.154 | 0.691 ± 0.187 | 0.820 ± 0.163 | 0.839 ± 0.392 | 0.722 ± 0.380 | 0.551 ± 0.173 | 0.039 | 0.015 | 0.060        | 0.043 | <b>0.245</b> | 0.093 |
| 22.67 : 271.228 | 0.837 ± 0.130 | 0.799 ± 0.208 | 1.033 ± 0.241 | 0.909 ± 0.290 | 0.930 ± 0.255 | 0.755 ± 0.167 | 0.247 | 0.065 | <b>0.004</b> | 0.015 | 0.558        | 0.143 |

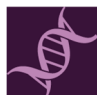

|                 |               |               |               |               |               |               |       |       |              |       |       |       |
|-----------------|---------------|---------------|---------------|---------------|---------------|---------------|-------|-------|--------------|-------|-------|-------|
| 22.67 : 277.217 | 0.798 ± 0.380 | 0.740 ± 0.677 | 0.955 ± 0.707 | 0.700 ± 0.311 | 1.445 ± 1.565 | 1.003 ± 0.998 | 0.382 | 0.095 | 0.022        | 0.035 | 0.848 | 0.183 |
| 23.17 : 227.201 | 0.806 ± 0.331 | 0.988 ± 0.571 | 1.224 ± 0.665 | 0.678 ± 0.193 | 1.155 ± 0.684 | 0.885 ± 0.392 | 0.863 | 0.179 | <b>0.042</b> | 0.039 | 0.038 | 0.030 |
| 23.44 : 303.233 | 1.006 ± 0.371 | 0.884 ± 0.349 | 1.092 ± 0.371 | 0.852 ± 0.353 | 1.038 ± 0.403 | 0.797 ± 0.366 | 0.844 | 0.178 | 0.001        | 0.011 | 0.596 | 0.150 |
| 23.68 : 485.282 | 1.044 ± 0.378 | 1.039 ± 0.393 | 1.020 ± 0.373 | 0.886 ± 0.231 | 1.092 ± 0.301 | 1.087 ± 0.527 | 0.623 | 0.138 | 0.366        | 0.105 | 0.757 | 0.172 |
| 23.80 : 421.332 | 1.254 ± 0.718 | 1.053 ± 0.471 | 1.039 ± 0.343 | 0.988 ± 0.411 | 1.097 ± 0.381 | 1.130 ± 0.282 | 0.724 | 0.155 | <b>0.348</b> | 0.103 | 0.399 | 0.119 |
| 23.84 : 559.473 | 0.824 ± 0.483 | 0.842 ± 0.676 | 1.211 ± 0.801 | 0.708 ± 0.251 | 1.342 ± 1.102 | 0.952 ± 0.892 | 0.788 | 0.166 | 0.008        | 0.020 | 0.446 | 0.124 |
| 23.88 : 279.233 | 0.873 ± 0.310 | 0.764 ± 0.461 | 1.124 ± 0.531 | 0.784 ± 0.222 | 1.161 ± 0.645 | 0.904 ± 0.582 | 0.604 | 0.133 | 0.001        | 0.013 | 0.896 | 0.187 |
| 23.91 : 375.275 | 1.578 ± 1.207 | 1.253 ± 0.763 | 1.219 ± 1.113 | 1.118 ± 0.484 | 1.295 ± 0.870 | 1.483 ± 1.139 | 0.788 | 0.164 | <b>0.846</b> | 0.181 | 0.725 | 0.168 |
| 24.23 : 445.332 | 1.215 ± 0.609 | 1.267 ± 0.544 | 0.923 ± 0.470 | 0.890 ± 0.429 | 0.992 ± 0.310 | 0.895 ± 0.255 | 0.263 | 0.069 | 0.647        | 0.146 | 0.299 | 0.106 |
| 24.58 : 473.282 | 1.061 ± 0.314 | 0.989 ± 0.106 | 0.984 ± 0.225 | 1.111 ± 0.221 | 1.020 ± 0.140 | 0.995 ± 0.257 | 0.867 | 0.183 | 0.703        | 0.164 | 0.052 | 0.039 |
| 24.71 : 537.416 | 1.289 ± 0.617 | 1.113 ± 0.305 | 0.973 ± 0.390 | 1.008 ± 0.438 | 1.138 ± 0.424 | 0.965 ± 0.262 | 0.476 | 0.120 | 0.208        | 0.069 | 0.391 | 0.117 |
| 24.80 : 299.259 | 0.917 ± 0.289 | 0.903 ± 0.239 | 1.314 ± 0.423 | 1.233 ± 0.547 | 1.009 ± 0.540 | 0.917 ± 0.198 | 0.022 | 0.009 | <b>0.497</b> | 0.127 | 0.886 | 0.185 |
| 25.31 : 255.233 | 0.723 ± 0.329 | 0.783 ± 0.425 | 1.208 ± 0.691 | 0.727 ± 0.127 | 1.034 ± 0.418 | 0.845 ± 0.379 | 0.251 | 0.067 | <b>0.006</b> | 0.019 | 0.051 | 0.035 |
| 25.64 : 281.249 | 0.846 ± 0.384 | 0.757 ± 0.417 | 1.212 ± 0.513 | 0.784 ± 0.166 | 1.122 ± 0.517 | 0.841 ± 0.397 | 0.321 | 0.082 | 0.000        | 0.009 | 0.234 | 0.091 |

MI: 60% maximal inspiratory pressure (MIP); HI: ~90% MIP; LMM: Linear Mixed Model; p: p-values for the LMM; q: Adjusted p-values for the false discovery rate (FDR); G: Group main effect; T: Time main effect; *G\*T*: *Group\*Time* interaction. Bold values indicate significant main effects adjusted for the FDR of 0.2 at the significance level of 5%. Data were transformed by Box and Cox procedure before analysis and presented in their original scale. Analyzes were conducted in the SPSS software, version 25.0.



**Table S4.** Annotation parameters of the compound significantly different between or within-groups obtained by UHPLC-HRMS-based metabolomics.

| Compound                  | LMM effects | HMDB ID                                                  | Chemical Formula | Monoisotopic Mass | Ion                   | <i>m/z</i> | Matched fragments ( <i>m/z</i> ) and mass error (ppm)                                                                                                                                                    |
|---------------------------|-------------|----------------------------------------------------------|------------------|-------------------|-----------------------|------------|----------------------------------------------------------------------------------------------------------------------------------------------------------------------------------------------------------|
| 3-Methylsuberic acid      | Time        | HMDB0059783                                              | C9H16O4          | 188.1049          | [M-H] <sup>-</sup>    | 187.0973   | 97.0660 (1); 125.0975 (2); 187.0986 (5); 123.0825 (8); 169.0886 (9).                                                                                                                                     |
| Arachidonic acid          | Time        | HMDB0001043                                              | C20H32O2         | 304.2402          | [M-H] <sup>-</sup>    | 303.2331   | 59.0136 (5); 205.1957 (0); 231.2111 (0); 259.2435 (4); 285.2233 (5); 303.2323 (2).                                                                                                                       |
| Valine                    | Interaction | HMDB0000883<br>HMDB0250806                               | C5H11NO2         | 117.0790          | [M-H] <sup>-</sup>    | 116.0712   | 116.0732 (8).                                                                                                                                                                                            |
| Hydroxyhexadecanoic acid* | Time        | HMDB0112184<br>HMDB0112186<br>HMDB0112188<br>HMDB0112189 | C16H32O3         | 272.2351          | [M-H] <sup>-</sup>    | 271.2274   | 55.0185 (7); 225.2217 (3); 253.2193 (8); 271.2273 (2).                                                                                                                                                   |
| Linoleic acid             | Time        | HMDB0000673                                              | C18H32O2         | 280.2402          | [M-H] <sup>-</sup>    | 279.2330   | 279.2325 (1); 280.2359 (2); 281.2375 (1).                                                                                                                                                                |
| Linolenelaidic acid       | Time        | HMDB0030964                                              | C18H30O2         | 278.2246          | [M-H] <sup>-</sup>    | 277.2170   | 241.1966 (0); 259.2021 (0); 277.2165 (0).                                                                                                                                                                |
| LysoPC(0:0/16:0)          | Interaction | HMDB0240262                                              | C24H50NO7P       | 495.3325          | [M+H] <sup>+</sup>    | 496.3404   | 57.0703 (7); 60.0811 (5); 71.0861 (8); 81.0693 (7); 86.0969 (6); 95.0855 (0); 97.1017 (5); 98.9843 (1); 104.1073 (3); 125.1321 (3); 184.074 (4); 258.1098 (1); 313.2727 (3); 478.3293 (0); 496.3403 (1). |
| LysoPC(14:0/0:0)          | Time        | HMDB0010379                                              | C22H46NO7P       | 467.3012          | [M+HCOO] <sup>-</sup> | 512.2996   | 224.0686 (3); 227.2012 (2); 452.2783 (0).                                                                                                                                                                |
| LysoPC(16:0/0:0)          | Time        | HMDB0010382                                              | C24H50NO7P       | 495.3325          | [2M+H] <sup>+</sup>   | 991.6728   | 184.0736 (1); 496.3407 (1).                                                                                                                                                                              |
| LysoPC(18:2/0:0)          | Interaction | HMDB0010386                                              | C26H50NO7P       | 519.3325          | [2M+H] <sup>+</sup>   | 1039.6728  | 86.0970 (7); 104.1069 (1); 124.999 (6); 146.9823 (3); 184.0735 (1); 258.1117 (6); 502.3304 (2); 520.3396 (0); 542.3205 (2).                                                                              |
| LysoPC(P-16:0/0:0)        | Group       | HMDB0010407                                              | C24H50NO6P       | 479.3376          | [M+HCOO] <sup>-</sup> | 524.3358   | 78.9590 (1); 168.043 (1); 224.0694 (0); 239.237 (4); 464.3135 (2).                                                                                                                                       |
| LysoPE(18:0/0:0)          | Interaction | HMDB0011130                                              | C23H48NO7P       | 481.3168          | [M-H] <sup>-</sup>    | 480.3094   | 152.9957 (1); 214.0497 (5); 283.2638 (2); 480.3107 (2).                                                                                                                                                  |

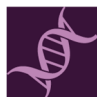

|                         |                  |                            |            |          |                    |              |                                                                                                                                                                                                                      |
|-------------------------|------------------|----------------------------|------------|----------|--------------------|--------------|----------------------------------------------------------------------------------------------------------------------------------------------------------------------------------------------------------------------|
| LysoPE(P-16:0/0:0)      | Interaction      | HMDB0011152                | C21H44NO6P | 437.2906 | [M-H] <sup>-</sup> | 436.2821     | 78.9591 (1); 122.0007 (4);<br>122.9858 (5); 137.0016 (5);<br>140.012 (1); 152.9957 (1);<br>196.0365 (8); 375.2289 (5); 436.2824 (2).                                                                                 |
| Oleic acid              | Time             | HMDB0000207                | C18H34O2   | 282.2559 | [M-H] <sup>-</sup> | 281.2489     | 281.2485 (0); 282.2520 (0).                                                                                                                                                                                          |
| o-Tyrosine              | Time/Interaction | HMDB0006050                | C9H11NO3   | 181.0739 | [M-H] <sup>-</sup> | 180.0667     | 72.0091 (0); 74.0255 (9);<br>93.0340 (3); 107.0500 (2);<br>119.0501 (1); 134.0609 (1);<br>136.0771 (2); 163.0403 (1);<br>180.0660 (3).                                                                               |
| Palmitic acid           | Time             | HMDB0000220                | C16H32O2   | 256.2402 | [M-H] <sup>-</sup> | 255.2331     | 237.2239 (10); 255.2328 (1);<br>256.2354 (1).                                                                                                                                                                        |
| Sphingosine 1-phosphate | Interaction      | HMDB0000277                | C18H38NO5P | 379.2488 | [M-H] <sup>-</sup> | 378.2411     | 78.9590 (1); 378.2403 (3).                                                                                                                                                                                           |
| Tryptophan              | Interaction      | HMDB0000929<br>HMDB0013609 | C11H12N2O2 | 204.0899 | [M+H] <sup>+</sup> | 205.0971     | 91.0541 (2); 115.0548 (10);<br>117.0576 (7); 118.0654 (3);<br>130.0652 (5); 132.0813 (1);<br>140.0488 (3); 142.0653 (2);<br>143.0725 (7); 144.081 (3);<br>146.0605 (5); 147.0637 (5);<br>159.0917 (2); 188.0713 (1). |
| Tryptophan              | Interaction      | HMDB0013609<br>HMDB0000929 | C11H12N2O2 | 204.0899 | [M-H] <sup>-</sup> | 203.0828     | 116.0505 (1); 117.0536 (5);<br>142.0661 (6); 159.0917 (8);<br>186.0567 (2); 204.0859 (0).                                                                                                                            |
| Unknown                 | Interação        | -                          | -          | -        | Positive           | Unfragmented | -                                                                                                                                                                                                                    |
| Unknown                 | Interação        | -                          | -          | -        | Positive           | Unfragmented | -                                                                                                                                                                                                                    |
| Unknown                 | Interação        | -                          | -          | -        | Positive           | Unfragmented | -                                                                                                                                                                                                                    |
| Unknown                 | Interação        | -                          | -          | -        | Positive           | 550.3883     | -                                                                                                                                                                                                                    |
| Unknown                 | Interação        | -                          | -          | -        | Positive           | Unfragmented | -                                                                                                                                                                                                                    |
| Unknown                 | Interaction      | -                          | -          | -        | Negative           | Unfragmented | -                                                                                                                                                                                                                    |
| Unknown                 | Interaction      | -                          | -          | -        | Negative           | 152.8837     | -                                                                                                                                                                                                                    |
| Unknown                 | Interaction      | -                          | -          | -        | Negative           | 112.9856     | -                                                                                                                                                                                                                    |
| Unknown                 | Interaction      | -                          | -          | -        | Negative           | Unfragmented | -                                                                                                                                                                                                                    |
| Unknown                 | Interaction      | -                          | -          | -        | Positive           | Unfragmented | -                                                                                                                                                                                                                    |
| Unknown                 | Interaction      | -                          | -          | -        | Positive           | Unfragmented | -                                                                                                                                                                                                                    |

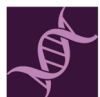

|         |                  |   |   |   |          |              |   |
|---------|------------------|---|---|---|----------|--------------|---|
| Unknown | Interaction      | - | - | - | Positive | Unfragmented | - |
| Unknown | Interaction      | - | - | - | Positive | Unfragmented | - |
| Unknown | Interaction      | - | - | - | Positive | Unfragmented | - |
| Unknown | Interaction      | - | - | - | Positive | Unfragmented | - |
| Unknown | Interaction      | - | - | - | Positive | Unfragmented | - |
| Unknown | Time             | - | - | - | Negative | 96.9600      | - |
| Unknown | Time             | - | - | - | Negative | 103.0398     | - |
| Unknown | Time             | - | - | - | Negative | 585.3508     | - |
| Unknown | Time             | - | - | - | Negative | Unfragmented | - |
| Unknown | Time             | - | - | - | Negative | 559.4726     | - |
| Unknown | Time             | - | - | - | Negative | 291.0310     | - |
| Unknown | Time             | - | - | - | Positive | Unfragmented | - |
| Unknown | Time             | - | - | - | Positive | 274.2742     | - |
| Unknown | Time             | - | - | - | Positive | 209.1022     | - |
| Unknown | Time             | - | - | - | Positive | Unfragmented | - |
| Unknown | Time/Interaction | - | - | - | Positive | Unfragmented | - |
| Unknown | Time/Interaction | - | - | - | Negative | 154.9180     | - |
| Unknown | Time/Interaction | - | - | - | Negative | 233.1538     | - |
| Unknown | Time/Interaction | - | - | - | Negative | 612.3843     | - |
| Unknown | Time/Interaction | - | - | - | Negative | 652.3241     | - |

LMM: Linear mixed model effects; \*Hydroxylated isomers.

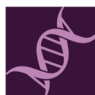

**Table S5.** Summary of the Metabolite Set Enrichment Analysis and altered pathways Pre to Post-inspiratory muscle training.

| Pathway                                           | Library | Total | Expected | Hits | P-value | FDR    | Decision | Enrichment ratio* |
|---------------------------------------------------|---------|-------|----------|------|---------|--------|----------|-------------------|
| Biosynthesis of unsaturated fatty acids           | KEGG    | 36    | 0.328    | 4    | 0.0002  | 0.0063 | SIG      | 12.20             |
| Aminoacyl-tRNA biosynthesis                       | KEGG    | 48    | 0.438    | 4    | 0.0007  | 0.0125 | SIG      | 9.13              |
| Ketone body metabolism                            | SMPDB   | 13    | 0.241    | 3    | 0.0014  | 0.0188 | SIG      | 12.45             |
| Butanoate metabolism                              | KEGG    | 15    | 0.137    | 2    | 0.0076  | 0.0250 | SIG      | 14.60             |
| Citrate cycle                                     | KEGG    | 20    | 0.182    | 2    | 0.0134  | 0.0313 | SIG      | 10.99             |
| Propanoate metabolism                             | KEGG    | 23    | 0.21     | 2    | 0.0175  | 0.0375 | SIG      | 9.52              |
| Fatty acid biosynthesis                           | SMPDB   | 35    | 0.649    | 3    | 0.0244  | 0.0438 | SIG      | 4.62              |
| Alanine, aspartate and glutamate metabolism       | KEGG    | 28    | 0.255    | 2    | 0.0255  | 0.0500 | SIG      | 7.84              |
| Alpha linolenic acid and linoleic acid metabolism | SMPDB   | 19    | 0.353    | 2    | 0.0462  | 0.0563 | SIG      | 5.67              |
| Butyrate metabolism                               | SMPDB   | 19    | 0.353    | 2    | 0.0462  | 0.0625 | SIG      | 5.67              |
| Valine, Leucine and Isoleucine Degradation        | SMPDB   | 60    | 1.11     | 3    | 0.0949  | 0.0688 | NS       | 2.70              |
| Phospholipid biosynthesis                         | SMPDB   | 29    | 0.538    | 2    | 0.0984  | 0.0750 | NS       | 3.72              |
| Arginine and Proline Metabolism                   | SMPDB   | 53    | 0.983    | 2    | 0.2580  | 0.0813 | NS       | 2.03              |
| Warburg effect                                    | SMPDB   | 58    | 1.08     | 2    | 0.2930  | 0.0875 | NS       | 1.85              |
| Arachidonic acid metabolism                       | SMPDB   | 69    | 1.28     | 2    | 0.3700  | 0.0938 | NS       | 1.56              |
| Tyrosine metabolism                               | SMPDB   | 72    | 1.34     | 2    | 0.3910  | 0.1000 | NS       | 1.49              |

\*Pathway enrichment ratio is computed by Hits/Expected hits; FDR: False discovery rate of 0.1.

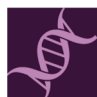

**Table S6** - Metabolite-metabolite networks sub-information table.

| KEGG ID | Label                          | Degree of centrality | Betweenness | Technique          |
|---------|--------------------------------|----------------------|-------------|--------------------|
| C00002  | Adenosine triphosphate         | 12                   | 32.73       | Not annotated      |
| C00007  | Oxygen                         | 10                   | 25.99       | Not annotated      |
| C00158  | Citrate                        | 10                   | 23.83       | <sup>1</sup> H NMR |
| C00073  | Methionine                     | 10                   | 15.83       | <sup>1</sup> H NMR |
| C00004  | NADH                           | 9                    | 19.60       | Not annotated      |
| C00219  | Arachidonic acid               | 9                    | 16.09       | UHPLC-HRMS/MS      |
| C03878  | Beta-N-Acetylglucosamine       | 9                    | 13.73       | Not annotated      |
| C00042  | Succinate                      | 8                    | 21.58       | <sup>1</sup> H NMR |
| C00078  | Tryptophan                     | 8                    | 14.15       | UHPLC-HRMS/MS      |
| C00249  | Palmitic acid                  | 8                    | 9.14        | UHPLC-HRMS/MS      |
| C00183  | Valine                         | 8                    | 2.31        | UHPLC-HRMS/MS      |
| C00712  | Oleic acid                     | 7                    | 3.30        | UHPLC-HRMS/MS      |
| C00148  | Proline                        | 7                    | 1.15        | <sup>1</sup> H NMR |
| C01595  | Linoleic acid                  | 6                    | 1.20        | UHPLC-HRMS/MS      |
| C00218  | Methylamine                    | 5                    | 10.19       | <sup>1</sup> H NMR |
| C00027  | Hydrogen peroxide              | 5                    | 4.96        | Not annotated      |
| C01996  | O-acetylcholine                | 5                    | 0.48        | <sup>1</sup> H NMR |
| C00166  | Phenylpyruvic acid             | 4                    | 21.14       | Not annotated      |
| C00207  | Acetone                        | 3                    | 4.48        | <sup>1</sup> H NMR |
| C00356  | 3-Hydroxy-3-methylglutaryl-CoA | 3                    | 1.47        | Not annotated      |
| C01089  | 3-Hydroxybutyrate              | 3                    | 1.40        | <sup>1</sup> H NMR |
| C08262  | Isovaleric acid                | 2                    | 0.28        | Not annotated      |
| C05984  | 2-Hydroxybutyrate              | 1                    | 0.00        | <sup>1</sup> H NMR |

KEGG: Kyoto Encyclopedia of Genes and Genomes.

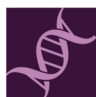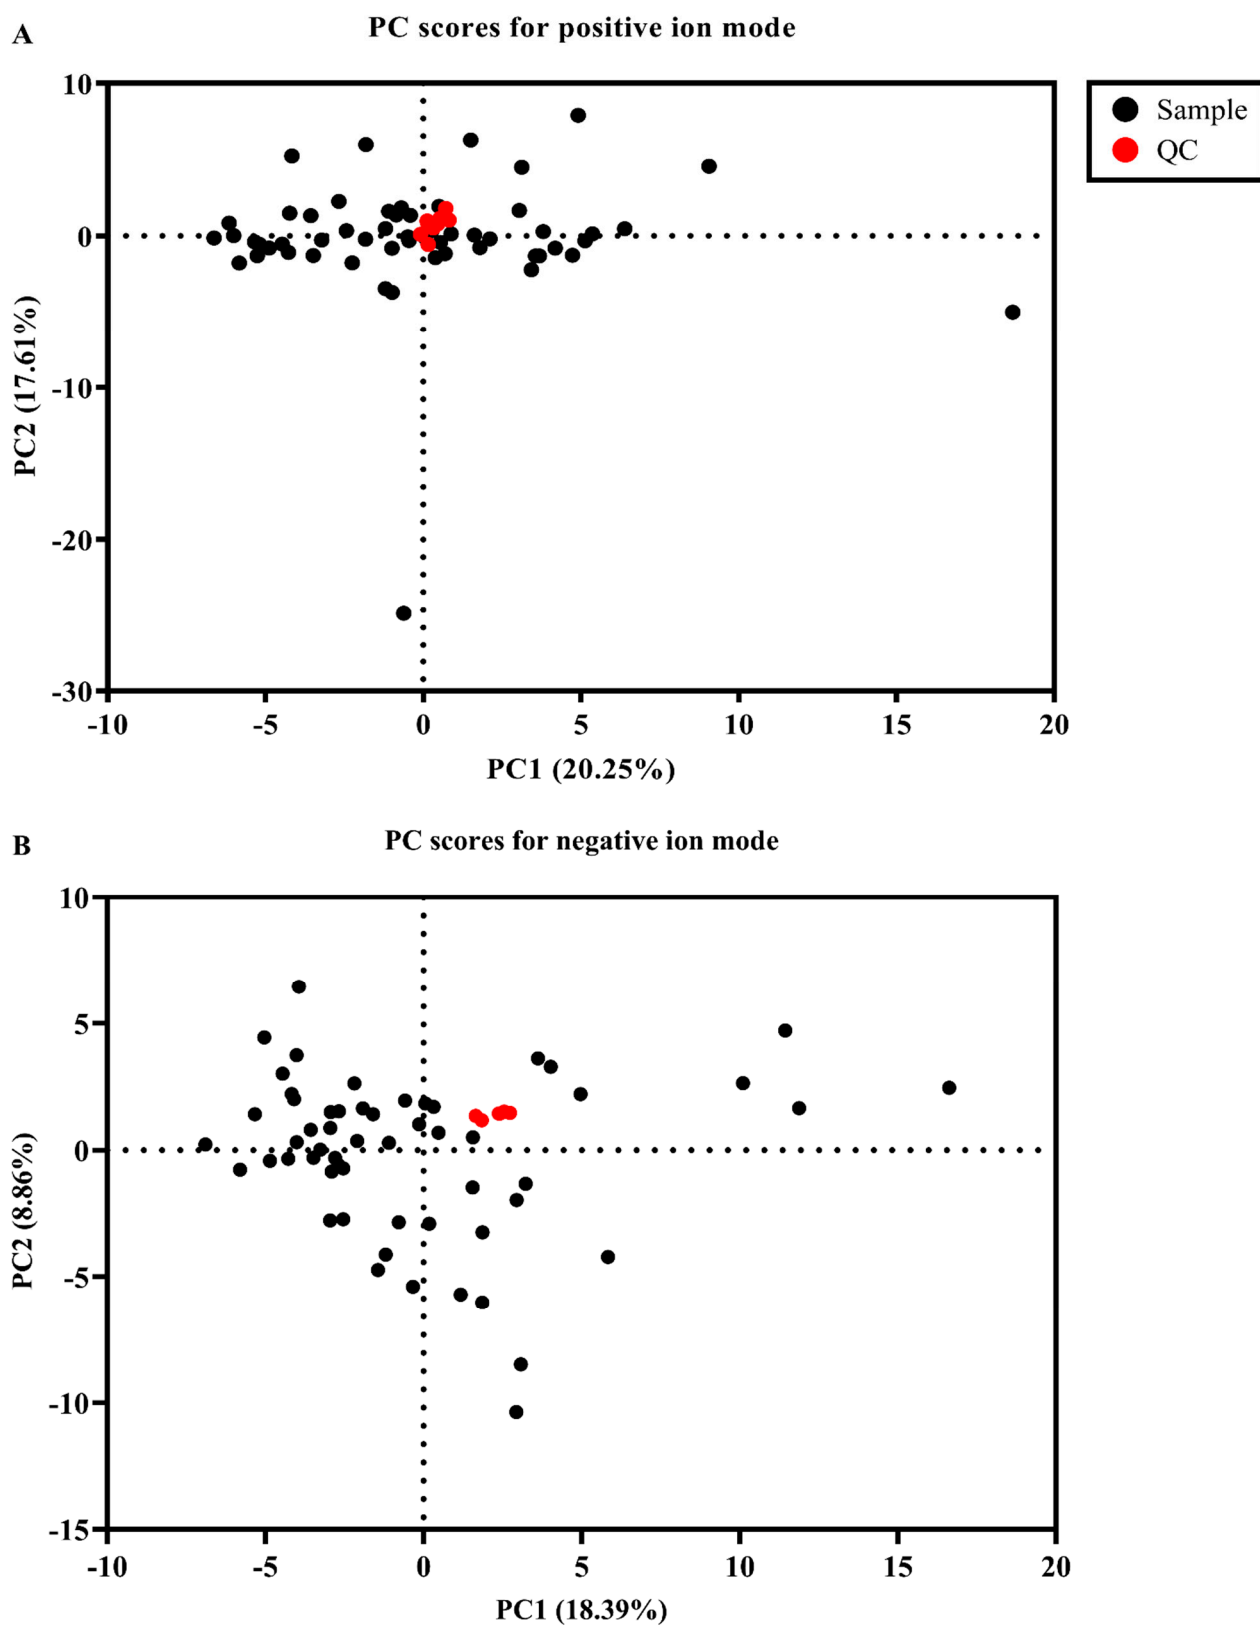

**Figure S1.** Instrumental stability assessed through quality control samples for the data obtained by UHPLC-HRMS/MS in positive (A) and negative (B) ionization mode.
